# Supplementary material for: Global Cross-Sectional Study Evaluating the Attitudes towards a COVID-19 Vaccine in Pregnant and Postpartum Women
Source: MDPI journal article supplement (doi:10.3390/vaccines11020390), 2023-02-08
Supplement: s1 [file s1]

**Table S1. Univariate analyses by country and across countries for potential prognostic factors for openness to receiving a COVID-19 vaccine oneself (vs. Neutral/Unsure and Not Open) among pregnant and postpartum women.** Odds ratios greater than one indicate that the respondents in the comparison group were more open than the reference group to vaccine acceptability.

| Prognostic Factor                         | United States |            | United Kingdom |             | India      |             | Brazil     |            | Across All Countries |            |
|-------------------------------------------|---------------|------------|----------------|-------------|------------|-------------|------------|------------|----------------------|------------|
|                                           | Odds Ratio    | 95% CI     | Odds Ratio     | 95% CI      | Odds Ratio | 95% CI      | Odds Ratio | 95% CI     | Odds Ratio           | 95% CI     |
| <b>Any Comorbidity vs. No Comorbidity</b> | 2.25          | 1.57, 3.22 | 2.08           | 1.44, 3.00  | 8.55       | 4.85, 15.08 | 1.16       | 0.72, 1.85 | 2.61                 | 2.14, 3.18 |
| <b>COVID-19 Positive vs. Not Positive</b> | 3.47          | 2.07, 5.84 | 6.95           | 3.60, 13.42 | 4.19       | 1.77, 9.93  | 1.45       | 0.65, 3.26 | 3.84                 | 2.78, 5.30 |
| <b>Pregnant vs. Postpartum</b>            | 1.83          | 1.24, 2.69 | 1.67           | 1.16, 2.41  | 1.85       | 0.88, 3.92  | 1.46       | 0.99, 2.16 | 1.97                 | 1.62, 2.40 |
| <b>Age 18 – 29 vs. 40+</b>                | 0.83          | 0.47, 1.45 | 1.24           | 0.68, 2.26  | 0.40       | 0.13, 1.26  | 0.68       | 0.32, 1.45 | 0.85                 | 0.61, 1.17 |
| <b>Age 30 – 39 vs. 40+</b>                | 0.86          | 0.49, 1.51 | 1.73           | 0.98, 3.06  | 0.92       | 0.31, 2.73  | 0.74       | 0.35, 1.58 | 1.35                 | 0.99, 1.86 |

CI, Confidence interval

**Table S2. Univariate analyses by country and across countries for potential prognostic factors for openness to children/other family members receiving a COVID-19 vaccine (vs. Neutral/Unsure and Not Open) among pregnant and postpartum women.** Odds ratios greater than one indicate that the respondents in the comparison group were more open than the reference group to vaccine acceptability.

| Prognostic Factor                         | United States |            | United Kingdom |             | India      |             | Brazil     |            | Across All Countries |            |
|-------------------------------------------|---------------|------------|----------------|-------------|------------|-------------|------------|------------|----------------------|------------|
|                                           | Odds Ratio    | 95% CI     | Odds Ratio     | 95% CI      | Odds Ratio | 95% CI      | Odds Ratio | 95% CI     | Odds Ratio           | 95% CI     |
| <b>Any Comorbidity vs. No Comorbidity</b> | 1.94          | 1.36, 2.78 | 2.09           | 1.44, 3.03  | 6.63       | 3.85, 11.43 | 0.80       | 0.51, 1.26 | 2.24                 | 1.84, 2.71 |
| <b>COVID-19 Positive vs. Not Positive</b> | 2.91          | 1.79, 4.74 | 7.88           | 3.86, 16.09 | 9.43       | 2.91, 30.53 | 0.89       | 0.42, 1.85 | 3.54                 | 2.59, 4.84 |
| <b>Pregnant vs. Postpartum</b>            | 2.20          | 1.48, 3.28 | 1.51           | 1.05, 2.18  | 2.05       | 0.99, 4.24  | 1.49       | 1.07, 2.20 | 1.97                 | 1.62, 2.40 |
| <b>Age 18 – 29 vs. 40+</b>                | 0.59          | 0.33, 1.03 | 1.14           | 0.62, 2.07  | 0.30       | 0.10, 0.92  | 0.88       | 0.43, 1.82 | 0.74                 | 0.54, 1.03 |
| <b>Age 30 – 39 vs. 40+</b>                | 0.70          | 0.40, 1.24 | 1.71           | 0.97, 3.04  | 1.00       | 0.34, 2.97  | 1.02       | 0.50, 2.11 | 1.37                 | 0.99, 1.89 |

CI, Confidence interval

**Table S3. Multivariate analyses by country and across countries for potential prognostic factors for openness to receiving a COVID-19 vaccine oneself (vs. Neutral/Unsure and Not Open) among pregnant and postpartum women.** Odds ratios greater than one indicate that the respondents in the comparison group were more open than the reference group to vaccine acceptability.

| Prognostic Factor                         | United States |            | United Kingdom |             | India      |             | Brazil     |            | Across All Countries |            |
|-------------------------------------------|---------------|------------|----------------|-------------|------------|-------------|------------|------------|----------------------|------------|
|                                           | Odds Ratio    | 95% CI     | Odds Ratio     | 95% CI      | Odds Ratio | 95% CI      | Odds Ratio | 95% CI     | Odds Ratio           | 95% CI     |
| <b>Any Comorbidity vs. No Comorbidity</b> | 1.73          | 1.16, 2.56 | 1.33           | 0.88, 2.01  | 7.19       | 3.76, 13.75 | 1.05       | 0.64, 1.72 | 1.85                 | 1.49, 2.29 |
| <b>COVID-19 Positive vs. Not Positive</b> | 2.47          | 1.38, 4.41 | 5.42           | 2.68, 10.95 | 1.51       | 0.58, 3.96  | 1.33       | 0.57, 3.08 | 2.49                 | 1.76, 3.52 |
| <b>Pregnant vs. Postpartum</b>            | 1.54          | 1.03, 2.30 | 1.23           | 0.83, 1.82  | 1.02       | 0.45, 2.33  | 1.41       | 0.94, 2.10 | 1.51                 | 1.23, 1.86 |
| <b>Age 18 – 29 vs. 40+</b>                | 1.24          | 0.67, 2.27 | 1.01           | 0.59, 2.05  | 0.73       | 0.21, 2.53  | 0.75       | 0.35, 1.63 | 1.08                 | 0.77, 1.52 |
| <b>Age 30 – 39 vs. 40+</b>                | 1.20          | 0.66, 2.20 | 1.60           | 0.88, 2.91  | 0.87       | 0.27, 2.78  | 0.78       | 0.36, 1.67 | 1.48                 | 1.06, 2.06 |

CI, Confidence interval

**Table S4. Multivariate analyses by country and across countries for potential prognostic factors for openness to children/other family members receiving a COVID-19 vaccine (vs. Neutral/Unsure and Not Open) among pregnant and postpartum women.** Odds ratios greater than one indicate that the respondents in the comparison group were more open than the reference group to vaccine acceptability.

| Prognostic Factor                         | United States |            | United Kingdom |             | India      |             | Brazil     |            | Across All Countries |            |
|-------------------------------------------|---------------|------------|----------------|-------------|------------|-------------|------------|------------|----------------------|------------|
|                                           | Odds Ratio    | 95% CI     | Odds Ratio     | 95% CI      | Odds Ratio | 95% CI      | Odds Ratio | 95% CI     | Odds Ratio           | 95% CI     |
| <b>Any Comorbidity vs. No Comorbidity</b> | 1.51          | 1.02, 2.24 | 1.36           | 0.89, 2.06  | 4.00       | 2.21, 7.22  | 0.76       | 0.47, 1.22 | 1.55                 | 1.25, 1.91 |
| <b>COVID-19 Positive vs. Not Positive</b> | 1.94          | 1.12, 3.36 | 6.33           | 3.00, 13.50 | 4.50       | 1.32, 15.32 | 0.93       | 0.43, 2.01 | 2.47                 | 1.76, 3.46 |
| <b>Pregnant vs. Postpartum</b>            | 1.91          | 1.27, 2.88 | 1.09           | 0.74, 1.63  | 1.13       | 0.50, 2.55  | 1.51       | 1.01, 2.26 | 1.54                 | 1.25, 1.89 |
| <b>Age 18 – 29 vs. 40+</b>                | 0.79          | 0.44, 1.43 | 0.99           | 0.53, 1.85  | 0.54       | 0.16, 1.81  | 0.97       | 0.46, 2.02 | 0.92                 | 0.66, 1.30 |
| <b>Age 30 – 39 vs. 40+</b>                | 0.92          | 0.50, 1.66 | 1.56           | 0.86, 2.84  | 1.06       | 0.33, 3.35  | 1.08       | 0.52, 2.23 | 1.50                 | 1.08, 2.08 |

CI, Confidence interval
