# Supplementary material for: Global Cross-Sectional Study Evaluating the Attitudes towards a COVID-19 Vaccine in Pregnant and Postpartum Women
Source: Vaccines (Basel). 2023 Feb 8;11(2):390. doi: 10.3390/vaccines11020390 (PMC9961540; doi:10.3390/vaccines11020390)
Supplement: Supplementary file 1 [file vaccines-11-00390-s001.zip › Supplementary Spreadsheet 1.xlsx]

## Sheet: Responses
CID	QCOUNTRY	Q1	Q2	Q19	Q20	Q30	Q76	Q77	Q78
469478165	1	1	2	2		2	1		2
469478511	1	2	3	1	1	1	2		3
469478640	1	2	3	1	2	2	5	3	3
469479272	1	2	2	2		2	4	4	4
469479876	1	2	2	2		2	2		2
469481042	1	1	3	1	1	2	1		4
469481760	1	1	3	1	2	2	2		1
469484523	1	2	1	2		2	2		2
469487650	1	2	3	2		2	3	3	3
469488578	1	1	4	1	2	2	3	4	2
469489276	1	2	1	2		2	2		2
469491160	1	1	3	1	1	1	2		2
469491578	1	1	4	2		1	3	3	3
469492560	1	1	3	1	2	1	2		2
469492568	1	1	1	2		2	2		4
469492584	1	2	2	1	2	2	1		1
469493285	1	3	2	2		2	3	4	3
469493620	1	2	4	2		1	5	5	5
469494030	1	4	4	2		2	4	4	4
469494625	1	1	4	2		1	3	2	3
469495156	1	2	3	1	2	1	2		1
469496070	1	3	4	1	2	1	1		1
469496201	1	2	3	1	2	1	2		1
469497099	1	2	4	2		2	5	5	3
469500196	1	2	1	2		1	1		1
469500373	1	1	2	2		2	2		2
469500969	1	1	2	1	2	1	4	2	3
469501813	1	2	3	2		2	3	2	3
469502329	1	2	2	1	1	1	2		2
469502540	1	1	2	1	2	1	2		3
469503143	1	2	3	2		2	1		2
469504854	1	1	3	1	1	1	2		3
469505080	1	2	2	1	1	2	3	3	3
469505181	1	2	2	2		2	3	3	3
469505543	1	1	3	1	2	2	1		1
469505574	1	1	1	2		2	1		1
469506901	1	2	4	1	2	2	2		3
469507199	1	1	2	1	2	1	2		1
469507296	1	3	2	1	2	1	2		2
469507697	1	2	3	1	2	2	2		2
469509681	1	2	3	1	2	2	2		2
469509756	1	2	2	1	1	1	3	3	3
469511041	1	2	4	2		1	2		1
469511055	1	2	4	2		1	2		4
469511342	1	1	2	1	2	1	2		3
469513344	1	1	2	1	1	1	3	3	2
469514205	1	2	1	1	1	1	1		1
469515519	1	2	2	1	2	1	3	2	1
469516154	1	2	3	2		1	5	5	2
469517309	1	2	3	1	2	2	2		2
469517420	1	1	4	2		1	1		1
469517723	1	2	3	1	2	2	3	3	3
469518038	1	1	3	1	2	2	4	1	4
469518764	1	2	2	2		1	2		2
469658093	1	2	4	2		1	1		1
469658292	1	2	2	1	1	1	1		2
469658650	1	1	2	1	2	1	2		3
469659866	1	2	2	1	2	1	3	3	3
469660387	1	1	3	1	2	2	1		1
469661893	1	3	1	1	1	1	2		1
469662044	1	2	2	1	2	1	3	2	4
469662529	1	1	4	1	2	1	2		3
469662646	1	3	1	1	1	1	1		2
469662737	1	2	3	2		2	2		3
469663041	1	2	1	2		1	1		1
469664023	1	3	1	1	1	1	1		1
469670055	1	2	2	1	2	2	1		2
469672949	1	2	3	1	1	1	2		1
469672992	1	1	4	1	2	1	5	4	5
469674747	1	1	2	2		1	3	3	4
469679115	1	2	1	2		1	3	2	4
469682421	1	4	1	1	1	1	2		1
469682765	1	2	3	1	2	2	1		1
469682858	1	2	1	1	2	1	2		1
469682940	1	3	4	1	1	1	1		1
469683025	1	2	3	1	1	1	2		3
469683093	1	2	4	1	2	2	1		1
469683169	1	2	4	2		2	1		2
469683264	1	3	3	1	2	1	3	3	2
469683445	1	2	2	1	2	2	3	3	3
469683521	1	2	1	1	2	2	3	2	2
469683561	1	2	4	2		1	3	1	5
469683566	1	2	3	2		2	3	1	3
469683606	1	2	4	2		1	3	2	2
469683721	1	2	2	1	2	2	1		2
469683739	1	1	3	2		2	2		3
469683895	1	3	4	1	2	1	3	2	3
469684058	1	2	3	1	2	1	2		4
469684134	1	1	2	1	2	1	2		1
469684162	1	1	1	1	2	2	5	2	1
469684217	1	2	3	1	2	2	1		1
469684397	1	2	2	2		1	3	2	2
469684407	1	2	4	2		2	1		1
469684508	1	1	2	1	1	2	1		1
469684513	1	1	2	1	2	1	3	2	3
469684613	1	2	3	2		2	2		3
469684683	1	1	4	1	2	2	5	2	5
469684771	1	1	1	2		2	4	1	4
469684871	1	1	2	1	1	1	1		3
469684925	1	2	2	1	1	1	1		1
469684945	1	1	4	1	2	2	4	2	5
469685260	1	2	2	2		2	4	2	3
469685396	1	1	1	2		2	3	3	3
469685471	1	1	2	1	2	2	2		3
469685540	1	2	1	1	1	1	3	3	2
469685606	1	1	4	2		2	3	3	2
469685747	1	1	3	1	2	2	5	5	3
469685865	1	2	4	2		2	4	2	4
469685874	1	3	2	1	2	2	4	2	4
469685883	1	2	1	1	2	2	3	1	3
469685942	1	1	3	2		2	4	2	4
469686028	1	2	2	1	1	1	1		1
469686063	1	1	1	2		2	5	2	5
469686146	1	1	1	1	2	1	3	3	2
469686173	1	1	2	1	2	2	2		2
469686576	1	1	4	2		2	3	4	4
469686895	1	2	2	1	2	2	1		1
469687266	1	1	3	1	2	1	3	3	2
469687299	1	1	2	1	2	1	1		1
469687537	1	2	1	1	2	1	1		2
469688026	1	1	1	1	2	2	3	5	4
469688138	1	1	3	2		1	3	3	3
469688633	1	1	4	1	2	2	4	3	4
469689038	1	1	4	2		1	3	1	3
469689149	1	1	4	2		2	1		1
469689167	1	2	2	1	1	1	2		1
469689517	1	1	2	2		1	2		2
469689621	1	1	2	2		1	3	3	4
469689753	1	3	1	1	1	1	1		1
469689988	1	1	2	1	1	2	1		3
469690098	1	2	4	2		2	1		3
469690181	1	2	1	2		1	2		1
469690226	1	2	2	1	2	2	1		1
469690440	1	1	2	1	2	2	5	4	5
469690502	1	1	2	2		2	2		2
469690803	1	1	2	1	2	2	1		1
469691098	1	2	3	2		2	4	3	3
469692401	1	1	2	1	2	2	2		2
469692647	1	2	4	1	2	2	4	5	3
469692652	1	2	3	1	2	1	1		1
469692923	1	2	2	1	1	1	4	4	3
469692974	1	2	2	2		1	3	4	3
469693454	1	2	3	1	1	1	1		1
469693456	1	1	2	1	2	2	3	2	3
469693554	1	2	4	1	2	2	2		4
469693804	1	1	4	2		2	3	2	2
469693968	1	1	1	1	1	1	1		2
469694108	1	2	4	1	2	1	1		1
469694366	1	3	3	2		2	3	4	3
469694437	1	1	2	1	2	2	1		1
469694878	1	1	2	1	2	1	3	2	3
469695183	1	1	3	1	1	1	1		3
469695202	1	1	3	2		2	3	3	4
469695239	1	2	3	1	2	1	3	3	3
469695251	1	2	2	1	1	2	5	3	2
469695258	1	3	1	1	1	1	1		1
469695508	1	2	2	1	1	1	1		1
469695609	1	1	2	1	2	2	3	2	3
469695706	1	2	3	2		2	4	4	5
469695764	1	1	1	2		2	1		1
469696071	1	2	4	2		1	5	2	5
469696086	1	2	2	1	1	1	1		1
469696125	1	1	3	1	2	2	4	2	5
469696805	1	1	4	2		1	5	3	5
469696848	1	3	4	1	1	1	2		3
469696864	1	1	1	1	2	2	2		3
469697005	1	1	3	2		1	3	3	3
469697601	1	1	4	1	2	2	3	4	3
469697705	1	2	3	1	1	1	1		2
469697744	1	2	3	1	1	2	4	5	3
469697899	1	1	4	1	2	1	1		2
469697927	1	1	2	1	2	1	2		2
469697958	1	2	3	1	1	2	4	4	3
469697983	1	1	2	1	2	2	4	1	4
469698740	1	1	2	1	2	2	1		4
469698748	1	1	4	2		2	5	2	5
469698761	1	2	3	2		2	3	2	3
469699445	1	2	4	2		2	4	2	3
469699538	1	2	1	2		2	4	3	2
469699739	1	2	4	1	2	2	4	2	4
469699788	1	1	2	1	2	2	3	2	2
469699997	1	1	2	1	2	1	2		3
469700125	1	3	2	1	1	1	4	5	4
469700131	1	2	2	2		2	1		1
469700392	1	1	4	2		1	5	1	4
469700503	1	4	1	1	1	1	1		1
469701103	1	3	1	2		2	4	2	4
469701283	1	1	4	1	2	2	3	2	3
469701366	1	1	1	2		2	1		3
469701478	1	2	1	1	1	1	3	4	3
469701503	1	1	1	1	2	1	1		1
469701580	1	2	1	1	2	1	2		2
469701837	1	3	3	1	1	1	2		2
469702043	1	1	2	1	1	1	1		1
469702415	1	2	1	1	1	1	2		3
469702450	1	2	2	1	1	1	1		3
469702492	1	2	3	2		2	2		2
469702636	1	1	1	1	2	2	2		3
469702837	1	1	3	1	2	1	2		4
469702977	1	1	4	1	2	2	1		1
469703224	1	2	1	1	1	1	1		1
469703521	1	1	3	2		2	5	4	5
469703867	1	4	2	2		2	3	3	3
469703876	1	1	4	1	2	2	5	2	5
469704088	1	1	4	2		2	2		2
469704192	1	2	2	2		1	3	4	2
469704235	1	2	4	1	2	2	3	2	3
469704237	1	1	2	1	2	2	2		3
469704941	1	2	2	2		2	2		2
469705004	1	1	3	1	2	1	2		2
469705020	1	2	4	2		1	4	3	4
469705283	1	3	3	2		2	3	2	3
469705616	1	1	4	2		2	1		1
469705667	1	2	2	2		2	5	5	5
469705690	1	2	4	1	2	2	1		1
469705738	1	3	2	2		1	1		1
469705786	1	2	2	2		2	3	3	4
469705799	1	2	3	1	2	2	3	2	3
469705930	1	1	1	2		1	1		1
469706546	1	2	2	2		2	4	5	4
469706547	1	1	3	2		1	4	4	5
469706587	1	2	2	2		1	3	1	3
469706716	1	1	2	1	1	1	2		2
469706801	1	3	1	2		2	2		2
469707030	1	2	2	1	2	1	1		1
469707056	1	1	2	1	2	2	5	3	3
469707151	1	2	4	2		2	3	3	2
469707319	1	2	2	1	2	2	1		1
469707612	1	1	2	1	2	1	1		3
469708127	1	3	2	1	1	1	2		2
469708224	1	1	3	1	2	2	4	3	5
469708409	1	1	4	1	2	1	2		2
469708542	1	2	3	2		2	3	5	3
469708666	1	1	4	1	2	2	3	4	1
469708773	1	3	1	1	1	1	1		2
469709125	1	2	1	2		2	4	2	3
469709347	1	1	4	2		2	5	3	5
469709547	1	2	2	2		2	1		1
469709969	1	1	2	2		2	5	5	5
469709973	1	2	4	1	2	2	2		2
469710006	1	1	1	1	1	1	1		1
469710243	1	1	1	2		2	5	3	5
469710269	1	2	4	2		2	5	3	5
469710785	1	2	4	2		2	2		2
469710842	1	2	2	2		1	2		2
469711338	1	1	2	1	1	1	3	2	2
469711445	1	3	3	1	1	1	1		1
469711523	1	2	3	2		2	2		1
469711796	1	1	2	1	2	2	2		1
469711863	1	2	2	2		1	2		1
469712251	1	1	2	1	2	1	1		2
469712353	1	4	4	2		1	4	4	5
469712439	1	2	2	2		2	4	3	5
469712498	1	2	2	1	2	1	2		3
469712647	1	1	4	2		2	4	2	4
469712982	1	3	3	1	2	2	3	1	1
469713153	1	1	2	1	2	1	2		3
469713175	1	2	3	1	2	1	1		1
469713176	1	2	2	2		2	4	2	4
469713186	1	1	1	2		2	2		1
469713552	1	3	4	2		1	5	2	3
469713603	1	2	3	1	1	1	4	3	3
469713881	1	2	4	1	2	2	4	2	2
469714049	1	2	3	1	2	1	3	2	1
469714123	1	1	1	2		1	1		1
469714621	1	2	2	1	2	1	3	3	3
469714866	1	1	4	1	2	1	1		1
469715279	1	2	1	1	1	1	1		1
469715366	1	2	4	1	2	2	3	1	3
469715456	1	2	4	1	2	1	2		2
469715643	1	1	2	2		2	1		1
469715811	1	2	3	1	1	1	4	3	3
469715955	1	2	4	2		1	4	2	4
469716036	1	3	2	1	2	1	2		2
469716038	1	1	2	1	2	2	3	3	2
469716215	1	2	4	2		1	4	4	4
469716401	1	1	2	1	2	2	2		3
469716426	1	1	2	1	2	2	1		1
469716440	1	1	2	1	1	1	2		3
469716767	1	2	3	1	2	2	2		2
469716993	1	2	4	2		1	3	2	3
469716999	1	2	4	1	1	1	1		1
469717029	1	3	3	1	1	2	1		2
469717121	1	1	3	2		1	2		3
469717409	1	1	4	2		2	3	2	3
469717735	1	1	3	1	1	1	4	3	2
469718026	1	2	3	2		2	1		2
469718128	1	1	4	1	2	2	2		4
469718592	1	1	4	1	2	2	3	1	3
469718759	1	3	4	1	1	1	3	2	3
469718865	1	4	3	1	1	1	2		1
469718947	1	2	4	2		1	5	2	5
469719040	1	3	3	1	2	2	3	2	3
469719052	1	2	4	2		2	3	2	3
469719060	1	1	3	1	2	1	2		4
469719155	1	1	1	1	2	2	2		2
469719219	1	4	3	1	2	2	1		1
469719435	1	4	2	1	2	1	2		2
469719511	1	1	3	1	1	1	2		1
469720162	1	2	2	1	2	2	1		1
469720219	1	1	2	1	2	1	3	2	4
469720354	1	1	3	2		2	3	2	3
469721089	1	1	2	2		2	2		1
469721240	1	1	2	1	2	2	1		1
469721390	1	1	2	2		2	3	2	3
469721437	1	1	2	2		2	3	4	3
469721663	1	2	4	2		2	4	2	3
469721777	1	3	4	2		2	4	1	4
469721792	1	1	2	1	2	2	4	3	3
469721984	1	3	1	2		2	3	2	3
469722002	1	1	4	2		2	4	2	3
469722138	1	1	4	2		2	1		1
469722174	1	1	2	2		1	4	2	4
469722311	1	1	2	1	2	2	3	1	3
469722425	1	4	3	1	2	1	2		2
469722505	1	1	2	1	2	1	1		1
469722531	1	1	2	1	2	1	2		3
469722706	1	1	2	1	1	1	1		1
469722846	1	1	3	1	2	1	3	4	2
469722851	1	1	4	2		2	4	2	4
469722917	1	2	4	2		2	2		3
469722940	1	2	2	1	1	1	2		2
469723256	1	3	3	1	1	1	4	5	4
469723320	1	1	4	1	2	2	4	3	5
469723361	1	3	2	1	2	2	2		3
469723367	1	1	1	2		2	1		1
469723493	1	2	3	1	2	2	3	2	3
469723784	1	2	2	1	2	1	3	2	3
469723853	1	2	2	2		2	4	3	4
469723905	1	1	1	2		2	3	2	3
469723947	1	1	1	1	2	2	1		1
469724003	1	2	2	1	1	1	2		2
469724083	1	1	3	1	1	1	2		3
469724131	1	2	3	2		2	3	2	3
469724142	1	3	2	1	1	2	1		1
469724239	1	3	3	2		2	4	4	4
469724374	1	1	3	1	1	1	2		4
469724406	1	1	3	1	2	2	2		3
469724575	1	1	4	1	2	2	3	2	3
469724776	1	2	3	2		2	3	4	3
469724828	1	1	2	1	2	2	3	2	4
469725245	1	2	4	2		2	2		3
469725334	1	1	2	1	2	2	3	1	3
469725377	1	1	4	1	1	1	1		1
469725506	1	2	4	1	2	2	1		1
469725524	1	2	4	1	2	2	3	2	4
469725586	1	2	1	2		2	1		1
469726452	1	1	4	2		2	5	2	5
469726488	1	2	4	2		1	5	5	5
469726491	1	1	3	1	2	1	2		2
469726600	1	3	3	2		2	3	3	2
469726701	1	1	2	1	2	2	2		1
469726749	1	3	2	2		2	3	3	1
469726898	1	2	2	2		2	3	2	3
469726963	1	3	1	1	1	1	1		1
469727074	1	1	1	1	2	1	3	1	2
469727329	1	2	4	2		2	1		1
469727422	1	1	4	1	2	2	3	2	4
469727504	1	2	4	1	2	1	3	1	3
469727812	1	1	2	1	1	1	1		1
469727930	1	1	4	2		1	3	2	3
469728019	1	2	3	2		1	3	2	3
469728057	1	1	3	2		1	2		3
469728141	1	1	4	2		2	3	2	3
469728276	1	2	1	2		1	3	1	3
469728333	1	1	4	1	2	2	2		3
469728762	1	2	2	1	2	1	3	3	3
469729080	1	1	3	1	1	1	1		1
469729233	1	1	4	2		2	4	5	5
469729258	4	1	4	1	2	2	3	1	3
469729338	1	1	2	2		2	3	2	2
469729357	4	2	3	1	2	2	1		1
469729380	1	2	4	2		2	4	1	4
469729426	4	1	4	2		2	1		1
469729449	1	1	2	1	1	1	3	3	1
469729465	1	1	3	1	2	2	1		1
469729476	4	2	2	2		2	1		1
469729598	4	2	4	1	2	2	1		1
469729747	4	1	4	1	2	2	1		1
469729764	4	2	2	1	1	1	2		3
469729793	4	2	3	1	2	2	1		1
469729892	4	1	2	1	2	2	2		1
469729901	1	2	2	1	2	2	2		2
469729927	4	2	1	1	2	1	4	3	4
469730024	4	1	4	2		2	3	2	3
469730105	1	1	2	2		1	2		2
469730127	4	2	4	2		2	1		1
469730171	4	2	4	1	2	2	4	1	4
469730206	1	1	4	2		2	5	2	5
469730234	1	1	4	1	2	2	1		1
469730345	1	2	2	1	2	1	1		3
469730602	4	2	3	1	2	2	1		1
469730615	1	1	2	2		2	4	5	3
469730704	1	2	1	2		2	3	4	3
469730709	4	4	2	1	2	1	2		2
469730751	4	1	4	1	2	1	2		2
469730758	1	1	4	1	2	2	2		3
469730835	1	2	2	1	2	2	4	2	4
469730874	1	1	2	2		2	2		2
469730889	1	3	3	2		2	3	1	3
469731003	4	2	3	2		2	1		1
469731007	1	2	4	1	2	2	1		1
469731089	1	1	3	2		2	2		2
469731243	1	3	2	1	1	1	1		2
469731452	1	2	4	1	2	1	2		2
469731454	1	1	4	1	2	1	2		2
469731598	1	2	2	2		2	3	1	3
469731708	1	1	4	1	1	1	4	2	4
469731824	4	2	2	1	2	2	4	2	3
469731945	4	3	4	2		2	1		1
469731992	4	2	4	2		2	2		2
469732284	1	1	1	2		2	5	5	5
469732342	1	1	2	1	1	1	2		4
469732566	1	1	4	1	2	2	3	3	3
469732590	1	1	4	1	2	1	3	3	3
469732611	1	1	2	2		2	1		3
469732676	1	1	1	2		2	4	4	4
469732768	1	2	4	2		2	2		2
469732867	1	1	3	1	2	2	3	2	3
469732869	1	1	1	1	2	1	2		2
469732899	4	1	3	2		2	3	2	3
469732919	1	2	2	2		2	3	2	3
469732979	1	1	4	1	2	1	1		1
469733095	1	4	4	1	1	1	1		2
469733104	1	1	4	1	2	1	2		2
469733109	4	2	2	2		2	1		1
469733153	1	1	4	1	2	2	5	3	5
469733433	4	1	4	2		2	1		1
469733471	4	2	4	2		2	2		2
469733635	1	1	3	1	2	2	2		2
469733656	1	1	4	1	2	2	5	5	5
469733671	1	1	3	1	2	1	3	4	3
469733729	1	1	3	1	1	1	3	2	2
469734115	1	3	4	1	2	1	2		2
469734145	1	2	3	2		1	5	1	5
469734447	1	3	4	2		1	2		3
469734609	4	1	4	1	2	2	2		2
469734922	1	2	1	2		2	2		2
469734993	1	1	4	2		1	5	3	5
469735084	1	2	4	1	2	1	1		3
469735413	4	1	3	1	1	2	3	2	2
469735457	1	3	2	1	1	1	3	2	2
469735722	1	3	2	1	2	1	3	2	3
469736674	1	1	2	2		2	2		2
469736732	1	2	4	2		2	2		3
469736855	4	2	4	1	2	2	4	2	2
469737005	1	2	2	2		1	2		4
469737213	1	4	4	2		2	5	2	5
469737585	1	2	3	2		1	3	4	4
469737720	1	1	1	1	2	1	4	4	5
469737799	1	2	4	2		1	3	4	3
469737927	1	1	3	1	2	2	3	2	3
469737983	1	1	3	2		2	5	2	5
469738025	4	1	4	2		2	2		2
469738129	4	1	4	2		2	1		1
469738300	1	2	2	1	1	1	2		1
469738404	1	2	1	1	2	2	1		1
469738750	1	1	4	2		2	3	2	3
469738780	1	2	1	1	2	2	2		2
469738824	1	4	2	1	2	1	2		1
469738834	1	2	4	1	2	1	4	2	4
469739304	1	2	2	1	2	1	2		2
469739338	1	4	1	1	1	1	1		1
469739510	1	2	1	2		2	2		2
469739513	4	3	1	1	2	1	1		1
469739535	4	1	2	1	2	2	1		1
469739625	1	1	4	1	2	2	3	3	4
469739709	1	2	2	1	2	2	1		1
469739759	1	2	4	1	2	2	2		4
469740042	1	3	3	2		1	2		4
469740194	1	1	2	2		1	2		1
469740243	1	1	4	1	2	2	1		1
469740301	1	2	4	2		2	3	2	4
469740320	1	1	4	1	2	2	2		1
469740590	4	2	3	1	2	2	1		1
469740842	1	2	3	1	2	2	3	1	3
469740863	1	1	2	1	2	2	3	2	4
469740898	1	2	2	2		2	2		2
469741033	4	1	1	2		2	4	2	2
469741152	1	3	3	1	1	2	3	3	4
469741186	1	3	1	2		2	4	2	4
469741192	4	1	3	1	2	1	5	2	5
469741357	1	1	2	1	1	1	2		1
469741388	4	2	2	2		1	3	2	3
469741403	1	2	4	2		2	1		1
469742064	1	3	2	1	1	1	1		1
469742133	1	1	2	1	2	2	3	3	2
469742279	1	2	1	2		2	3	3	3
469742314	1	1	1	1	1	1	1		1
469742329	1	1	2	1	2	2	3	2	2
469742339	1	2	1	2		2	3	1	1
469742511	4	2	4	1	2	1	1		3
469742581	4	2	4	2		2	3	2	4
469742662	1	2	4	2		2	5	4	5
469742759	4	2	1	1	2	2	1		1
469742811	1	1	2	2		2	4	2	3
469742823	1	1	2	2		2	1		2
469742996	1	2	2	2		1	1		1
469743247	1	2	1	2		2	3	2	2
469743302	1	1	2	1	2	1	1		2
469743402	4	2	3	2		2	1		1
469743444	1	2	4	1	1	1	1		1
469743552	4	2	3	2		2	5	1	5
469743553	4	1	4	2		2	3	2	5
469743559	1	1	1	1	2	1	3	4	2
469743759	1	1	4	2		2	2		2
469743764	4	1	4	2		2	2		2
469743811	1	1	4	2		2	5	5	5
469744005	1	2	4	1	2	2	2		4
469744104	4	2	4	2		1	2		2
469744157	1	1	4	1	2	2	4	2	5
469744171	4	1	4	2		1	1		1
469744246	1	2	3	1	2	2	2		2
469744349	1	2	2	1	1	1	3	3	3
469744465	1	2	4	2		2	5	2	5
469744640	1	2	1	2		2	3	2	4
469744833	4	1	4	2		2	2		2
469744901	1	1	4	1	2	2	5	2	5
469745033	4	1	4	2		2	2		2
469745268	1	1	4	1	2	1	2		2
469745339	1	1	4	1	2	2	4	2	3
469745511	1	2	2	2		2	3	2	3
469745620	1	1	4	1	2	1	1		1
469745678	4	2	4	2		2	3	3	3
469745682	1	2	2	1	1	2	1		2
469745759	1	2	3	1	1	1	1		1
469745964	4	2	4	1	2	2	3	1	2
469746251	1	3	3	2		2	4	4	3
469746450	1	1	4	2		2	5	5	5
469746470	1	2	4	2		1	5	3	5
469746597	1	1	3	1	2	2	3	2	2
469746636	4	1	4	2		2	5	2	3
469746666	1	1	2	1	2	2	2		3
469746867	4	1	4	2		2	3	2	4
469747007	4	1	4	2		2	2		2
469747035	1	2	2	2		2	4	4	2
469747212	1	1	4	1	2	2	2		3
469747279	4	3	2	2		2	2		2
469747305	4	1	1	1	1	1	1		1
469747336	1	1	3	2		2	1		1
469747428	1	2	4	1	2	2	2		3
469747477	4	1	4	2		2	1		1
469747534	4	1	4	2		2	1		1
469747663	1	2	4	2		1	3	2	3
469747788	1	1	4	2		2	4	3	4
469747839	1	2	4	1	2	2	1		1
469747900	1	2	1	2		1	1		1
469747931	1	1	1	2		1	1		1
469747955	1	2	4	2		1	4	5	3
469748062	1	1	3	1	2	2	3	2	3
469748368	1	2	4	1	2	2	5	2	4
469748435	1	2	4	1	2	2	2		2
469748692	1	1	4	1	2	2	3	2	3
469748706	1	4	4	2		2	1		1
469748852	1	2	3	2		1	2		3
469895502	4	1	4	2		2	1		1
469896001	4	2	3	2		2	3	2	3
469896076	4	2	1	2		2	4	2	4
469896271	4	1	4	2		2	3	2	2
469896490	4	2	4	2		1	1		1
469896492	4	1	4	2		2	3	2	3
469897186	4	1	4	2		2	2		2
469897291	4	2	4	2		2	2		2
469897510	4	2	3	1	2	1	1		1
469897642	4	1	4	2		2	1		1
469897960	4	1	2	1	2	1	2		3
469898078	4	1	4	2		2	3	2	3
469898224	4	2	4	2		2	2		2
469898719	4	1	2	1	2	2	2		2
469898787	4	1	4	2		2	2		2
469899404	4	1	2	1	2	2	1		1
469899416	4	1	4	2		2	2		2
469899602	4	2	4	2		2	1		1
469900073	4	2	2	1	2	1	2		2
469900844	4	3	2	2		1	1		1
469900873	4	1	4	2		1	1		2
469901129	4	2	2	1	2	2	4	2	4
469901394	4	1	2	2		2	3	1	3
469901653	4	2	4	2		2	1		1
469901843	4	2	4	2		2	2		2
469902340	4	1	4	2		2	2		2
469902517	4	2	4	2		2	3	1	3
469902676	4	1	3	2		1	1		1
469903310	4	1	4	2		2	2		2
469904166	4	2	2	2		2	2		1
469904794	4	2	4	2		2	1		1
469904872	4	4	3	1	2	2	3	2	3
469904914	4	2	1	1	2	1	1		1
469905517	4	1	2	2		2	3	1	3
469905745	4	2	2	2		2	1		1
469905896	4	2	3	1	2	2	1		1
469906141	4	3	4	1	2	2	4	2	4
469907066	4	2	2	1	2	2	1		1
469908141	4	1	4	1	2	2	2		2
469908156	4	1	4	1	2	2	3	2	3
469908632	4	2	4	2		1	2		2
469909026	4	1	2	2		2	1		1
469909041	4	2	2	2		2	2		2
469909158	4	2	3	2		2	4	1	4
469909324	4	1	4	1	2	2	2		2
469909613	4	2	4	2		2	2		2
469910167	4	2	1	2		2	2		2
469910687	4	2	4	1	2	1	1		1
469911287	4	2	2	1	2	2	1		1
469911508	4	1	4	2		2	3	2	3
469911897	4	2	4	2		1	2		2
469912061	4	2	4	2		2	1		1
469912698	4	2	2	1	1	2	1		3
469912862	4	1	2	1	2	2	3	4	3
469912911	4	2	2	1	2	1	4	3	4
469913464	4	2	4	2		2	2		1
469913487	4	2	3	1	1	1	2		2
469914058	4	2	2	1	2	2	1		1
469914987	4	2	3	1	2	2	1		1
469915007	4	1	4	1	2	2	1		1
469915709	4	1	4	2		2	1		1
469917831	4	2	2	1	2	2	1		1
469917908	4	2	1	2		2	1		1
469918761	4	2	4	2		2	2		1
469919119	4	1	4	2		2	1		2
469919167	4	2	2	2		2	1		1
469919203	4	2	2	1	1	1	1		1
469919216	4	2	4	2		2	1		1
469919510	4	2	3	2		2	1		1
469919775	4	2	3	1	2	1	1		1
469920888	4	1	4	2		1	3	2	3
469920997	4	3	3	1	2	2	2		1
469921384	4	1	1	1	2	1	1		1
469921785	4	1	1	2		2	4	2	3
469922837	4	2	2	1	2	1	4	1	2
469922850	4	1	4	2		2	1		1
469922907	4	2	2	1	2	1	1		1
469923429	4	1	2	2		2	1		1
469923978	4	2	4	2		2	1		1
469925020	4	1	4	2		2	1		1
469925713	4	1	2	1	2	2	2		2
469927353	4	2	1	1	1	1	1		1
469927420	4	1	4	2		2	3	1	1
469928854	4	2	2	2		2	4	2	3
469928886	4	1	4	2		2	3	1	3
469928968	4	2	4	2		1	3	2	3
469929218	4	1	1	1	2	2	1		2
469930420	4	1	4	1	2	1	1		1
469930566	4	2	2	2		1	1		1
469931974	4	1	2	1	2	1	2		1
469932299	4	2	4	1	2	1	3	1	5
469932405	4	2	4	2		2	3	2	3
469932786	4	1	4	1	2	1	3	3	3
469933404	4	1	4	1	2	2	3	1	3
469933471	4	3	2	2		2	1		1
469934138	4	2	4	1	2	2	1		1
469934299	4	2	4	2		2	1		1
469934404	4	3	2	2		2	1		1
469934990	4	1	4	1	2	2	1		1
469935765	4	1	4	2		2	3	1	3
469935864	4	1	4	2		2	1		1
469939236	4	2	4	2		2	1		1
469939706	4	1	4	1	2	2	1		1
469940802	4	2	4	1	2	2	3	1	3
469940969	4	2	3	1	2	2	1		1
469941721	4	2	4	2		2	3	2	2
469942021	4	2	1	1	2	2	1		1
469942223	4	1	1	1	2	2	1		1
469942646	4	2	3	2		2	4	2	4
469942652	4	2	4	2		2	2		2
469943190	4	1	1	2		1	4	4	4
469943584	4	2	2	1	2	2	1		1
469943964	4	1	4	1	2	2	2		2
469944168	4	1	3	1	2	2	2		2
469944566	4	1	4	2		2	3	2	3
469946448	4	1	4	2		2	4	2	2
469946511	4	1	3	1	2	2	1		1
469946531	4	2	2	1	2	2	3	1	3
469949063	4	2	1	1	1	1	2		2
469949186	4	1	4	2		2	2		3
469949459	4	1	2	1	2	1	4	2	5
469949625	4	1	4	2		2	3	2	3
469949666	4	2	2	1	2	1	2		3
469949896	4	1	4	1	2	1	3	1	3
469950890	4	1	3	2		2	1		1
469950922	4	2	4	1	2	1	1		1
469951319	4	2	3	2		2	1		1
469951695	4	1	1	2		2	1		1
469951877	4	2	4	1	2	2	2		2
469952090	4	1	3	2		2	1		1
469952381	4	2	4	2		1	1		1
469952903	4	2	4	2		2	3	1	4
469952981	4	1	2	2		2	1		1
469954002	4	1	2	2		1	3	2	3
469954415	4	2	2	2		2	2		2
469956883	4	1	4	1	2	2	1		1
469957365	4	2	2	2		2	1		1
469957568	4	3	1	2		1	1		4
469957710	4	2	1	2		2	3	1	3
469957874	4	2	4	1	2	1	1		1
469958628	4	2	4	1	2	1	4	1	4
469959458	4	2	4	2		2	2		2
469960094	4	2	4	2		2	1		1
469960893	4	3	1	2		2	1		1
469961078	4	1	2	2		2	2		2
469961284	4	2	4	1	2	2	1		1
469961451	4	1	1	1	2	2	1		1
469965359	4	2	2	1	2	2	2		2
469966218	4	1	3	2		2	3	2	3
469966825	4	2	2	1	2	2	1		1
469966979	4	2	2	1	2	2	1		1
469970188	4	1	2	1	1	1	2		2
469970371	4	2	4	2		2	2		2
469970867	4	1	4	2		2	2		2
469973477	4	2	2	1	2	2	3	3	4
469973656	4	1	4	2		1	1		1
469973718	4	2	3	1	2	1	1		1
469975494	4	1	4	2		1	2		2
469976562	4	2	4	2		2	1		1
469976882	4	1	3	1	2	2	2		2
469976931	4	2	4	1	2	2	1		1
469977274	4	2	3	1	2	2	2		2
469977302	4	1	4	2		2	3	2	3
469977616	4	2	4	2		2	2		2
469977747	4	2	4	2		2	1		1
469977947	4	3	2	1	1	1	3	3	2
469983497	4	1	4	1	2	1	2		2
469983766	4	1	4	2		2	3	1	4
469983987	4	2	2	1	2	2	1		1
469984869	4	1	1	1	2	1	1		1
469985307	4	3	2	1	2	2	1		1
469986038	4	2	1	1	2	1	1		1
469986912	4	2	3	1	2	2	2		2
469987891	4	1	4	2		2	3	3	3
469989478	4	1	4	2		2	2		3
469989766	4	1	4	2		2	1		1
469990497	4	2	4	2		2	3	1	3
469991059	4	2	2	2		1	2		1
469991323	4	2	4	1	1	2	1		1
469991330	4	1	4	2		2	2		1
469991831	4	1	2	1	2	2	1		1
469991905	4	1	4	2		2	1		1
469992112	4	1	2	1	2	2	2		2
469992273	4	1	4	1	2	2	1		1
469992318	4	2	2	1	2	1	3	2	4
469993505	4	2	4	1	2	2	4	2	4
469993704	4	2	1	2		2	4	2	2
469994031	4	2	3	1	2	2	3	1	3
469994477	4	3	4	2		1	1		2
469995416	4	1	1	1	2	2	1		1
469995566	4	2	2	2		2	3	2	2
469996132	4	2	2	1	2	2	2		4
469997255	4	2	4	2		2	1		1
469997458	4	1	4	2		2	1		1
469998805	4	1	4	2		2	1		2
469999680	4	3	1	1	2	2	3	1	3
470000407	4	2	4	2		2	1		1
470001311	4	2	4	2		2	3	2	3
470001558	4	1	4	1	2	2	1		1
470002791	4	1	4	2		2	2		2
470003158	4	1	4	2		2	3	3	3
470005026	4	1	4	2		2	2		2
470005486	4	2	4	2		2	1		1
470008728	4	1	4	2		2	1		5
470010271	4	1	1	2		2	5	2	4
470010690	4	1	4	1	2	2	3	2	2
470013688	4	1	4	1	1	2	1		2
470015310	4	2	4	1	2	2	1		1
470015884	4	2	4	1	2	2	1		2
470016741	4	1	1	1	2	2	5	2	5
470018071	4	1	1	2		2	2		2
470019576	4	1	2	1	2	2	3	2	3
470024283	4	1	4	2		2	2		1
470025816	4	1	4	1	2	2	3	2	3
470027968	4	2	2	1	2	2	5	2	5
470029186	4	3	4	1	2	2	2		2
470029441	4	4	1	1	2	2	1		1
470031348	4	2	2	1	2	2	1		1
470031377	4	1	2	2		2	3	3	3
470034407	4	2	1	2		1	3	3	3
470035434	4	1	1	1	2	2	1		1
470038821	4	1	4	2		2	2		2
470041734	4	2	4	2		2	3	2	2
470042045	4	2	4	2		2	3	1	3
470042913	4	2	4	2		2	2		2
470043313	4	2	4	2		2	1		1
470045359	4	1	4	2		2	1		1
470047260	4	1	4	2		2	1		1
470047529	4	2	2	1	2	2	1		1
470047724	4	1	4	1	2	2	4	2	4
470049036	4	1	4	1	2	2	4	2	4
470050276	4	1	4	2		2	3	1	4
470050384	4	1	2	1	2	2	1		1
470050586	4	2	2	1	2	2	1		1
470051156	4	1	1	1	2	2	1		2
470051229	4	1	4	1	2	2	1		1
470052069	4	2	1	1	2	2	2		1
470053011	4	2	4	2		2	1		1
470053048	4	1	1	1	2	2	1		1
470053514	4	2	4	2		2	3	3	3
470053692	4	1	1	2		1	1		1
470053873	4	1	4	2		2	1		1
470053877	4	1	4	1	2	1	1		1
470054144	4	2	4	2		2	3	3	3
470054414	4	2	4	1	2	2	3	2	3
470054598	4	3	3	2		2	4	2	3
470055247	4	3	4	1	2	2	3	2	3
470055451	4	1	4	2		1	3	3	3
470056050	4	1	1	2		2	3	1	2
470056602	4	2	4	1	2	1	1		1
470056986	4	2	4	1	2	1	1		1
470057570	4	3	1	1	2	2	5	2	5
470058355	4	2	4	1	1	2	3	1	3
470058557	4	3	4	2		2	1		2
470058791	4	2	4	2		2	5	2	5
470059269	4	2	4	2		2	3	2	3
470060126	4	2	2	2		2	2		2
470060357	4	1	4	2		2	1		1
470061710	4	1	4	2		2	1		2
470061843	4	1	4	2		2	3	2	3
470062663	4	1	4	1	1	2	2		3
470062986	4	2	2	1	2	2	1		1
470063488	4	2	1	2		1	5	1	5
470064388	4	1	3	2		2	1		1
470064394	4	1	4	2		2	3	3	3
470064514	4	2	2	1	2	2	2		1
470064603	4	2	2	1	2	2	1		1
470065386	4	2	4	2		1	1		1
470068162	4	2	3	1	1	1	2		2
470069199	4	3	2	1	2	1	1		1
470069347	4	1	2	1	2	1	2		2
470069755	4	1	4	2		1	3	2	3
470070700	4	1	4	2		2	1		1
470070781	4	1	3	2		2	1		1
470071178	4	1	4	1	2	2	1		1
470071840	4	2	4	1	1	1	2		3
470072651	4	1	4	2		2	1		1
470074238	4	1	4	1	1	2	5	2	4
470074550	4	2	2	2		2	2		2
470076040	4	2	4	1	2	2	1		1
470076733	4	2	2	1	2	1	2		1
470077050	4	2	2	1	2	2	2		2
470077820	4	2	2	1	2	1	1		1
470078414	4	1	1	1	2	2	1		1
470078899	4	1	4	1	1	2	1		1
470080798	4	1	3	1	1	2	1		1
470081816	4	1	3	1	2	1	1		1
470082287	4	2	3	2		1	2		1
470083898	4	2	4	2		2	3	2	3
470086753	4	1	2	2		2	1		1
470087189	4	2	1	1	2	2	1		1
470088175	4	2	3	1	2	2	4	2	3
470088385	4	2	1	1	1	1	3	3	4
470088527	4	1	3	1	2	2	3	2	3
470089355	4	1	4	2		2	1		1
470089938	4	2	4	1	2	2	2		2
470090409	4	1	4	1	2	2	1		1
470090860	4	2	1	1	2	2	1		1
470090886	4	2	1	2		1	2		3
470091313	4	3	1	2		2	1		1
470091332	4	2	4	1	2	2	2		2
470094628	4	2	2	2		2	1		1
470095139	4	1	3	2		2	4	2	4
470095424	4	1	3	2		2	3	2	4
470095426	4	3	3	2		2	2		2
470095443	4	1	4	2		2	4	2	3
470095660	4	1	1	1	2	2	1		1
470096068	4	2	1	1	1	1	2		3
470098051	4	1	4	2		2	3	2	4
470098355	4	1	1	2		2	1		1
470099298	4	3	2	1	2	1	1		1
470099314	4	2	4	1	2	2	2		1
470099613	4	2	1	2		2	2		2
470099617	4	1	3	2		2	1		1
470099842	4	1	1	2		2	2		2
470099895	4	2	4	2		2	3	2	3
470099911	4	1	1	2		2	2		1
470100124	4	1	2	2		2	1		2
470100175	4	2	2	2		2	2		2
470100208	4	2	3	1	2	2	1		1
470100222	4	2	2	1	2	1	1		1
470100235	4	2	2	1	2	2	1		1
470100310	4	2	4	1	2	1	2		1
470100337	4	2	1	1	2	2	2		2
470100414	4	2	2	1	1	1	3	3	1
470100450	4	1	2	1	2	2	2		1
470100503	4	1	4	2		2	4	2	4
470100545	4	1	3	1	1	1	1		1
470100804	4	2	2	2		2	1		1
470100902	4	2	1	1	2	2	2		1
470100959	4	1	2	2		2	1		1
470101142	4	3	1	2		1	2		2
470101168	4	1	4	1	2	2	2		2
470101206	4	2	1	2		1	3	2	1
470101390	4	3	3	1	2	2	3	2	3
470101431	4	2	1	1	2	2	2		2
470101953	4	1	2	1	2	2	1		1
470102057	4	1	1	1	1	1	1		1
470102077	4	3	3	2		2	1		1
470102228	4	3	4	2		2	1		1
470102412	4	1	3	1	2	2	1		1
470102467	4	2	1	1	2	2	4	2	4
470102551	4	1	4	2		2	3	4	4
470102710	4	3	3	2		2	2		2
470102728	4	1	4	2		2	1		2
470103061	4	2	2	2		2	5	2	5
470103073	4	2	2	2		1	4	2	3
470103236	4	2	3	1	1	1	1		1
470103298	4	1	1	1	2	2	1		1
470103471	4	1	4	2		2	1		1
470103715	4	1	1	2		1	3	5	4
470103849	4	1	2	1	2	2	1		1
470104073	4	3	2	2		2	3	1	3
470104339	4	2	4	2		2	4	2	4
470104596	4	1	2	1	1	2	1		1
470104690	4	3	2	1	2	2	2		2
470105143	4	1	2	1	2	1	1		1
470105395	4	2	3	2		2	1		1
470105644	4	3	4	1	2	2	1		2
470105815	4	1	1	1	2	2	1		1
470105838	4	1	4	2		2	1		1
470105852	4	2	2	2		2	1		1
470105891	4	2	2	1	2	2	3	1	3
470105962	4	2	3	1	2	1	4	2	4
470106130	4	1	2	1	2	1	2		2
470106133	4	1	4	2		2	1		1
470106145	4	3	4	1	2	2	1		1
470106304	4	2	2	1	2	2	2		1
470106325	4	1	1	2		2	1		1
470106353	4	2	3	2		2	3	2	3
470106585	4	2	3	2		2	3	3	3
470106699	4	2	2	1	2	1	1		1
470106721	4	2	2	2		2	2		2
470106732	4	1	3	1	2	1	2		2
470106783	4	1	4	2		2	3	2	3
470106852	4	2	4	1	2	1	3	1	2
470107102	4	2	2	1	2	2	1		1
470107140	4	1	2	1	2	1	2		1
470107142	4	2	1	2		2	1		1
470107240	4	2	4	2		1	1		1
470107500	4	1	2	1	1	1	1		1
470107519	4	1	1	1	2	2	1		1
470107560	4	1	4	2		1	2		3
470107654	4	2	1	2		2	3	2	1
470107670	4	2	2	2		2	1		1
470107951	4	2	2	1	2	2	2		1
470107990	4	1	1	1	2	2	1		1
470108017	4	1	3	1	2	2	3	2	3
470108066	4	1	2	1	1	1	1		1
470108185	4	2	3	1	2	2	1		1
470108384	4	2	4	2		1	2		2
470108399	4	2	3	2		2	2		2
470108403	4	1	1	1	1	2	3	2	3
470108840	4	1	2	1	1	2	2		1
470109097	4	2	4	2		2	3	2	3
470109254	4	1	3	2		2	1		1
470109332	4	2	2	2		2	2		2
470109452	4	1	4	2		2	1		1
470109511	4	2	2	1	2	2	3	2	3
470109693	4	1	4	2		2	3	2	3
470109698	4	2	2	2		1	2		2
470109762	4	1	1	2		2	1		1
470109799	4	3	3	2		2	1		1
470109829	4	3	4	1	1	1	2		3
470109935	4	2	4	2		1	5	2	3
470110383	4	2	2	1	1	1	3	2	2
470110418	4	2	2	1	2	2	1		1
470110498	4	1	2	2		1	1		3
470111043	4	2	3	2		2	1		1
470111144	4	1	4	1	2	1	1		1
470111704	4	2	3	1	2	2	1		1
470111728	4	2	2	2		2	1		1
470112037	4	3	1	1	2	2	3	3	3
470112289	4	4	1	2		2	1		1
470112298	4	2	4	2		2	2		2
470112423	4	3	2	1	1	1	2		3
470112565	4	1	1	2		2	1		1
470112610	4	3	1	2		1	1		1
470112619	4	1	4	1	2	2	1		1
470113021	4	3	2	1	2	2	1		1
470113435	4	2	2	1	2	2	2		2
470113602	4	2	2	2		2	2		2
470113775	4	1	3	2		2	2		2
470113811	4	1	3	2		2	2		1
470113872	4	1	4	1	1	1	1		1
470114569	4	2	2	2		2	1		1
470114787	4	2	1	1	2	2	1		1
470115254	4	2	4	2		2	1		1
470115448	4	2	2	1	2	2	1		1
470115781	4	2	1	2		2	1		1
470116161	4	2	3	1	2	2	1		1
470116338	4	1	4	1	2	2	3	3	3
470116436	4	1	1	2		2	5	3	5
470116500	4	1	1	2		2	1		1
470116568	4	2	2	1	2	2	4	2	3
470117099	4	2	2	2		2	1		1
470117108	4	1	1	1	2	2	1		1
470117552	4	3	4	1	1	2	1		1
470117710	4	1	1	2		2	3	2	1
470118044	4	1	3	2		1	3	3	3
470118401	4	2	1	1	1	1	1		1
470118754	4	1	2	1	2	2	1		1
470118831	4	3	3	1	2	2	1		1
470119008	4	2	3	1	2	2	1		1
470120135	4	2	2	1	2	2	2		2
470519952	2	1	4	2		1	3	2	3
470536431	3	2	1	1	2	1	1		1
470536514	3	2	3	1	2	1	2		2
470536596	3	1	4	1	2	2	1		1
470536650	2	2	3	2		1	1		1
470536669	2	2	4	1	2	2	3	2	3
470536702	3	2	3	1	2	1	1		1
470536730	2	1	2	1	2	2	2		2
470536914	2	3	4	2		2	1		2
470537043	3	2	1	1	1	1	1		1
470537223	2	3	3	2		1	1		1
470537291	2	2	4	2		2	3	1	3
470537678	3	2	2	2		1	1		1
470537690	3	2	2	2		1	1		3
470537730	3	1	1	1	1	1	1		1
470537795	3	2	1	1	2	2	2		2
470537917	3	2	1	2		1	4	2	1
470537941	2	3	1	1	2	1	1		2
470538243	2	3	4	2		1	3	2	3
470538536	3	1	2	1	2	2	3	3	3
470538588	2	2	4	2		2	2		2
470538660	3	2	2	1	1	1	3	3	1
470538792	3	1	1	1	1	1	2		2
470539016	3	3	4	1	1	1	1		2
470539037	3	2	1	1	1	1	1		1
470539261	2	2	4	1	2	2	2		2
470539291	3	2	1	1	2	2	1		1
470539664	3	2	3	1	2	1	2		3
470539713	3	2	1	2		2	1		1
470541301	2	2	4	1	2	2	1		1
470547966	2	2	4	2		2	4	2	4
470548005	2	3	4	2		2	3	2	3
470548444	2	2	3	2		1	2		1
470548498	2	2	3	1	2	1	2		2
470549145	2	2	3	2		2	3	3	3
470549638	2	2	4	2		2	1		1
470549879	2	2	2	1	1	2	2		4
470550042	2	1	4	1	2	2	3	2	3
470550206	2	2	4	1	2	2	1		1
470550464	2	3	3	1	2	2	3	2	3
470550603	2	2	1	2		2	5	2	5
470550655	2	2	1	1	2	1	1		1
470550874	2	2	3	1	2	1	2		2
470551092	2	2	2	1	1	2	2		2
470551216	2	1	1	1	1	1	2		3
470552283	2	2	1	2		2	2		2
470552565	2	1	1	2		2	2		2
470552712	2	2	4	2		2	2		2
470552865	2	2	4	1	2	2	1		1
470553200	2	1	4	2		1	1		1
470553716	2	1	3	2		1	3	3	3
470554356	2	3	3	2		2	3	5	3
470554806	2	1	1	1	2	1	2		2
470561684	2	2	4	2		2	2		2
470561736	3	1	3	1	2	2	1		3
470561914	2	2	4	2		2	3	2	3
470561976	3	3	2	1	1	1	1		1
470562063	3	1	2	1	2	2	3	3	1
470562110	2	2	2	1	1	1	2		2
470562185	2	1	2	2		2	3	3	3
470562374	3	1	4	1	2	1	3	2	3
470562489	3	2	4	1	2	2	1		1
470563087	2	2	2	2		2	5	2	5
470563823	2	1	2	1	1	1	2		1
470563861	2	2	4	1	1	1	1		1
470563888	2	1	1	1	2	1	2		3
470563926	2	1	2	2		2	3	2	3
470564036	2	2	2	2		2	2		2
470564166	2	2	4	2		1	3	3	2
470564974	2	2	4	1	2	2	3	1	4
470565445	2	2	1	1	2	1	2		3
470565796	2	1	2	2		1	3	3	3
470565909	2	2	1	1	2	1	5	4	5
470566821	2	1	1	1	1	1	1		1
470574805	3	2	2	1	2	1	1		1
470576949	3	1	1	1	2	1	2		1
470577122	3	2	2	1	1	1	1		1
470577182	3	2	2	1	2	2	2		2
470577507	3	2	1	1	1	1	1		1
470578037	3	2	4	1	1	1	1		2
470578340	3	2	2	2		2	3	2	1
470578673	3	2	4	1	2	1	1		3
470579071	3	2	3	1	2	1	1		1
470579140	3	2	4	2		2	1		1
470579158	3	2	2	1	1	1	1		1
470579386	3	1	2	1	2	1	2		2
470579982	3	2	3	1	2	2	2		2
470580851	3	2	1	1	2	1	1		1
470580922	3	2	1	1	1	1	1		1
470581081	3	2	1	1	2	1	1		1
470581320	3	2	4	1	1	1	3	1	2
470581378	3	2	2	1	2	1	1		1
470581492	3	2	2	1	1	1	1		2
470581553	3	2	1	1	2	1	1		1
470581625	3	2	1	1	2	1	1		1
470582293	3	2	2	1	1	1	1		1
470582387	3	1	1	1	2	1	1		1
470582389	3	1	2	1	1	1	1		1
470583544	3	2	4	2		2	1		1
470583744	3	2	2	1	1	1	1		2
470583778	3	2	2	1	2	1	2		3
470585087	3	2	1	1	2	1	1		1
470587021	3	2	4	1	2	1	1		2
470587057	3	2	1	1	2	2	2		2
470587084	3	2	2	1	1	1	1		1
470749882	2	2	2	1	2	2	1		1
470750065	3	1	2	1	2	2	2		2
470750097	2	2	3	1	2	1	1		1
470750101	3	1	1	2		2	1		2
470750104	3	2	2	1	2	2	3	2	3
470750137	3	2	4	1	1	1	1		2
470750236	3	2	4	1	2	1	2		2
470750415	3	2	1	1	2	1	1		1
470750449	3	2	2	2		1	2		1
470750523	3	2	3	1	2	1	1		1
470750537	3	2	3	1	2	1	1		1
470750538	2	2	2	2		2	3	2	2
470750670	3	2	1	1	1	1	1		1
470750706	3	2	3	1	2	1	1		1
470750727	2	1	3	1	1	1	2		2
470750771	3	1	3	1	2	2	1		1
470750782	3	2	2	1	2	1	2		1
470750865	2	1	3	2		2	3	3	3
470750878	2	2	3	1	2	2	2		1
470750960	3	2	2	1	2	1	1		1
470751115	3	2	1	1	1	1	1		1
470751160	3	2	4	1	1	1	1		3
470751197	2	2	4	1	2	2	3	2	3
470751213	2	1	2	1	2	1	2		2
470751283	3	2	1	2		2	2		3
470751374	2	2	2	1	1	1	1		1
470751399	3	3	2	1	2	1	1		1
470751445	3	2	2	1	2	1	1		1
470751536	2	1	4	2		2	1		1
470751785	3	1	2	2		2	2		3
470751926	2	1	1	2		2	5	5	5
470751959	3	2	2	1	2	2	1		1
470752081	3	2	3	1	2	1	1		1
470752303	3	2	2	1	2	2	2		2
470752375	3	2	2	1	2	1	1		1
470752423	3	2	3	1	2	2	1		1
470752428	3	2	3	1	1	1	1		1
470752449	3	2	1	1	2	1	1		1
470752623	3	2	1	1	1	1	1		1
470752695	3	2	3	1	2	2	1		1
470752796	3	3	1	1	2	1	1		3
470752898	3	2	1	1	1	1	1		1
470752903	2	2	3	1	1	1	2		1
470752992	2	2	4	2		2	2		2
470752998	2	2	1	2		2	5	4	5
470753019	3	2	4	1	2	1	1		2
470753022	3	1	2	1	2	1	1		1
470753056	3	2	3	1	1	1	1		1
470753085	3	2	3	1	2	2	5	2	1
470753103	3	1	4	1	2	2	3	2	3
470753250	3	2	4	1	2	2	1		1
470753379	2	2	4	2		2	1		1
470753403	3	2	1	1	1	1	1		1
470753734	2	2	4	1	1	2	2		2
470753739	2	2	2	1	2	1	2		1
470753774	3	1	1	1	2	2	2		1
470753961	3	3	2	1	2	2	2		2
470753998	3	1	4	2		2	2		2
470754104	3	2	3	2		1	1		2
470754147	3	2	3	1	2	2	1		1
470754294	2	1	2	1	2	2	3	2	5
470754461	3	2	1	1	1	1	1		1
470754598	3	3	1	1	2	2	1		1
470754604	2	2	3	1	2	2	2		2
470754726	3	2	1	1	1	1	1		1
470754772	2	2	4	2		2	1		1
470754950	2	1	2	1	2	2	3	2	2
470755121	2	2	4	1	2	2	3	2	3
470755156	2	2	4	2		2	1		1
470755172	3	1	2	1	2	1	1		1
470755234	2	1	4	2		2	4	2	4
470755296	2	2	4	2		2	2		2
470755387	2	3	3	2		2	3	3	3
470755636	2	1	3	1	2	2	5	5	5
470755654	3	2	3	1	1	1	2		1
470755880	2	2	2	1	1	1	2		2
470755993	2	3	3	2		2	4	2	4
470755997	3	2	2	1	2	1	4	2	4
470756086	2	1	4	2		2	1		1
470756138	2	1	4	2		1	4	2	5
470756223	3	2	2	1	1	1	1		1
470756239	2	2	3	2		2	1		1
470756301	3	3	1	1	1	1	1		2
470756337	3	2	2	1	2	1	1		1
470756559	2	2	2	2		2	1		1
470756606	3	2	2	1	2	2	1		1
470756676	3	1	1	1	2	2	1		1
470756784	2	1	1	2		2	5	5	5
470756833	3	2	3	1	1	1	1		1
470756917	3	1	1	2		2	2		1
470756923	3	2	3	1	1	1	2		1
470756937	3	2	2	1	1	1	1		1
470756942	3	2	3	1	2	2	1		1
470757064	3	2	2	1	2	1	1		1
470757334	3	1	4	1	2	2	3	2	3
470757503	2	1	4	1	2	2	1		1
470757539	3	2	3	2		2	1		1
470757617	3	2	1	1	2	1	1		1
470757645	3	3	1	1	1	1	1		1
470757711	3	1	3	1	2	2	2		3
470757841	2	2	1	2		2	4	2	4
470757918	3	2	2	1	2	1	1		2
470757973	3	2	1	1	1	1	1		1
470758022	2	2	4	2		2	1		1
470758049	3	2	1	1	2	1	2		2
470758133	3	2	2	1	2	1	1		1
470758197	3	2	2	1	1	1	1		1
470758207	3	2	2	1	2	1	1		1
470758218	3	1	1	1	2	2	1		1
470758245	3	2	1	2		1	3	2	3
470758376	3	2	2	1	2	2	1		1
470758419	3	1	3	1	1	1	4	2	2
470758494	3	1	3	1	1	1	3	3	1
470758536	3	2	3	1	2	1	1		1
470758914	3	2	3	1	2	1	1		1
470759090	2	2	2	2		2	1		1
470759373	3	1	1	1	2	1	1		2
470759500	3	2	1	1	1	1	1		1
470759634	3	2	3	1	2	2	3	2	1
470759637	2	2	2	1	2	2	2		2
470760055	2	1	4	1	2	1	3	3	2
470760057	3	2	1	1	1	1	1		1
470760312	3	2	2	1	2	2	1		2
470760462	2	2	4	1	2	1	2		2
470760540	3	2	2	1	2	1	1		1
470760759	3	3	1	1	1	1	1		1
470761058	3	2	2	1	2	1	1		1
470761118	3	2	2	1	2	1	1		3
470761252	2	2	2	2		2	2		2
470761282	3	3	1	1	1	1	1		1
470761390	3	2	2	1	2	1	1		1
470761635	3	1	4	1	2	1	2		4
470761827	3	2	2	1	2	1	2		2
470762000	3	2	2	1	2	1	1		1
470762051	2	2	4	1	2	2	5	5	2
470762053	2	1	3	1	1	1	2		2
470762173	3	2	2	1	2	1	1		1
470762175	3	2	1	1	1	1	1		1
470762245	3	2	2	1	2	1	1		1
470762273	3	2	1	1	2	1	1		1
470762293	3	2	2	1	2	2	3	2	4
470762378	3	2	3	1	1	1	1		1
470762468	3	4	2	1	2	1	1		1
470762566	3	2	2	1	2	1	1		2
470762766	2	2	4	2		1	4	2	4
470762853	3	2	2	1	2	1	1		2
470762987	3	3	2	1	2	1	1		1
470763120	3	2	2	1	2	2	5	3	5
470763154	3	2	2	1	2	1	1		1
470763160	3	2	3	1	2	2	2		1
470763247	3	1	3	1	2	1	2		2
470763709	3	2	2	1	2	1	1		1
470763769	3	1	1	1	1	1	1		2
470763995	3	2	3	1	2	2	3	2	3
470764048	3	2	2	1	2	2	1		2
470764057	3	2	2	1	2	1	1		1
470764263	2	1	2	1	2	2	2		2
470764404	2	2	3	2		2	3	2	3
470764603	3	2	3	1	1	1	1		1
470764761	3	2	3	1	2	1	1		1
470764875	3	2	2	1	2	1	1		1
470764895	3	1	4	2		2	1		1
470764897	3	2	3	1	2	1	1		1
470764952	3	2	3	1	2	1	1		1
470764990	3	2	2	1	2	1	2		1
470765097	3	2	2	1	2	1	1		1
470765186	2	1	4	2		2	4	2	3
470765264	2	3	1	1	1	1	1		2
470765321	3	2	1	1	2	2	2		2
470765469	3	2	2	1	2	1	1		1
470765653	3	1	1	1	2	2	2		2
470765738	2	2	4	2		1	2		2
470765797	3	2	2	1	2	1	1		2
470765860	3	2	2	1	2	1	1		1
470766351	2	1	2	1	1	2	4	2	3
470766427	3	2	1	1	1	1	1		1
470766474	3	2	2	1	2	1	2		1
470766577	3	2	3	2		2	2		2
470766629	2	1	4	1	2	2	3	2	3
470766667	2	2	4	2		2	3	2	3
470766743	3	2	2	1	2	1	1		1
470766749	3	2	2	1	2	2	5	5	5
470766790	3	2	2	1	2	2	4	4	4
470766805	2	3	4	2		1	4	3	5
470766842	2	2	4	2		2	3	3	4
470767086	3	3	2	1	2	1	1		1
470767132	3	2	2	1	2	1	1		2
470767193	3	2	4	1	1	1	2		2
470767217	2	2	4	1	2	2	1		1
470767300	2	2	1	2		2	1		1
470767374	3	2	2	1	2	1	1		1
470767625	3	2	1	2		2	4	2	4
470767654	2	3	2	1	1	1	1		1
470767776	3	2	3	2		2	2		2
470768112	3	2	1	1	2	1	1		1
470768115	2	2	3	2		2	3	3	3
470768126	2	1	3	2		2	5	2	5
470768283	3	2	3	1	1	2	1		1
470768409	3	2	3	1	2	1	2		2
470768454	2	2	4	2		2	3	1	2
470768624	3	2	2	1	2	1	3	2	2
470768680	3	2	2	1	2	1	1		2
470768692	2	2	4	2		2	1		1
470768826	3	2	2	2		1	1		1
470768996	3	2	1	1	1	1	1		1
470769107	3	2	2	1	2	1	2		1
470769784	3	2	2	1	2	1	1		1
470769917	3	2	2	1	2	1	1		1
470770005	3	3	2	2		2	3	1	3
470770353	3	2	2	1	2	2	2		1
470770403	3	2	2	1	2	2	5	2	5
470770698	3	3	2	1	2	1	1		1
470770752	2	1	1	2		1	2		2
470770808	3	2	2	2		1	1		2
470770833	2	1	4	1	2	1	1		1
470770849	3	2	2	1	2	1	1		1
470770933	3	2	3	1	2	2	3	2	2
470770960	2	2	4	2		2	2		2
470770979	3	2	2	1	2	1	1		1
470770982	2	3	3	2		2	3	2	2
470771011	3	2	3	1	2	1	1		1
470771176	2	2	2	1	1	1	3	2	2
470771283	3	2	2	1	2	2	1		1
470771332	3	2	2	1	2	1	1		1
470771334	3	2	4	2		2	2		2
470771454	3	2	3	1	2	2	1		1
470771521	2	3	4	2		2	3	2	4
470771759	3	2	2	1	2	1	2		2
470771842	2	2	4	2		2	1		1
470772018	3	2	1	1	1	1	1		1
470772024	3	2	3	1	2	1	1		1
470772065	3	2	2	1	2	1	1		1
470772106	3	4	1	1	1	1	1		1
470772125	3	2	1	1	2	1	3	2	3
470772467	2	2	4	1	1	2	2		3
470772517	3	1	2	1	2	1	1		2
470772661	2	3	3	1	2	2	1		1
470772768	3	2	2	1	2	2	5	2	5
470772808	2	1	1	2		1	3	4	3
470772845	3	2	2	2		1	2		1
470772848	3	2	2	1	1	1	2		1
470772906	3	2	2	1	2	1	1		2
470772987	3	3	2	1	2	1	1		1
470773127	2	1	4	2		2	2		2
470773146	3	3	1	1	1	1	1		1
470773178	3	2	2	1	2	2	4	4	4
470773196	3	3	4	1	2	2	1		1
470773243	3	2	1	1	2	1	4	3	3
470773249	2	1	2	1	2	1	1		1
470773275	2	2	2	2		2	3	3	2
470773286	3	2	2	1	2	1	1		2
470773447	2	3	4	2		1	1		1
470773456	2	1	4	1	2	2	3	2	4
470773839	3	2	3	1	1	1	1		1
470773873	3	1	4	1	2	2	1		1
470773887	2	2	4	1	2	2	5	3	5
470773896	3	1	3	1	2	1	2		2
470773920	2	2	4	2		1	4	5	5
470773997	3	1	3	1	2	1	2		3
470774238	3	2	1	1	2	2	1		1
470774244	3	2	2	1	1	1	1		1
470774254	2	1	3	1	2	1	2		1
470774274	2	1	1	2		2	4	4	3
470774359	2	3	3	2		2	2		2
470774371	3	2	2	1	2	1	1		1
470774431	3	2	2	1	2	1	1		2
470774445	3	2	1	1	1	1	1		1
470774634	3	1	2	1	2	1	1		3
470774651	3	2	2	1	2	1	1		1
470774944	3	2	2	1	2	2	5	2	5
470774959	2	1	1	1	1	1	2		2
470774999	3	2	3	1	2	2	1		2
470775048	3	2	2	2		2	4	5	4
470775342	2	1	2	2		2	4	4	4
470775400	3	2	2	2		1	1		1
470775409	3	2	2	1	2	1	1		1
470775473	3	2	2	1	2	1	1		2
470775559	2	2	2	1	2	1	1		2
470775568	3	2	3	1	2	1	1		1
470775589	3	3	2	1	2	1	1		1
470775625	3	1	2	1	2	1	2		4
470775662	3	1	2	1	2	1	2		2
470775676	2	2	3	1	2	1	1		1
470775757	3	2	2	1	1	1	1		1
470775817	3	2	2	2		1	2		2
470776097	2	1	2	2		2	2		4
470776132	2	3	3	1	2	1	2		2
470776339	3	1	3	1	1	1	2		1
470776358	3	3	1	1	1	1	1		1
470776691	3	2	1	1	2	1	1		1
470776699	2	1	2	1	1	2	2		2
470776881	3	2	2	1	2	1	1		1
470777146	3	1	2	1	2	2	2		3
470777319	3	2	2	1	1	1	1		1
470777591	3	2	2	1	2	2	3	1	4
470777601	3	1	1	1	1	1	2		2
470777613	3	2	2	1	2	1	2		2
470777697	2	2	2	1	1	1	2		2
470777808	3	2	1	1	1	1	1		1
470777908	3	2	2	1	2	1	1		2
470777933	3	1	2	1	2	1	1		2
470777997	2	1	2	1	2	1	2		1
470778030	2	2	1	2		1	2		2
470778124	3	2	1	1	1	1	1		2
470778126	3	1	2	1	2	2	2		1
470778151	3	2	2	1	2	1	2		1
470778316	3	2	4	1	2	2	2		2
470778391	3	2	2	1	1	1	2		1
470778529	3	2	4	1	2	2	1		1
470778642	3	1	4	1	2	2	1		2
470778646	2	2	4	1	2	2	3	2	3
470778872	3	2	2	1	2	1	1		2
470779085	3	2	1	1	1	1	1		1
470779176	3	2	4	1	2	1	4	2	4
470779304	3	3	1	1	1	1	1		1
470779495	3	2	1	1	1	1	1		1
470779609	3	2	3	1	2	2	3	1	3
470779832	2	2	3	2		2	3	2	3
470779851	3	2	2	1	2	1	1		1
470779874	3	3	2	1	2	1	1		1
470779942	2	2	4	2		2	3	2	3
470780024	3	2	2	1	2	1	1		2
470780101	3	2	3	1	1	1	3	2	3
470780118	3	2	1	1	1	1	1		2
470780129	3	2	3	1	2	1	1		1
470780167	3	2	2	1	2	2	5	5	5
470780196	3	2	2	1	2	2	3	2	4
470780380	3	1	2	1	2	2	2		2
470780482	2	2	2	1	2	1	2		1
470780557	3	1	1	1	2	2	2		1
470780638	3	1	4	1	2	2	1		2
470780813	2	2	4	1	2	2	3	3	4
470780884	2	3	1	1	1	1	4	4	2
470780893	2	1	3	2		2	4	2	4
470780913	2	2	2	1	2	2	4	2	2
470780927	2	2	4	2		1	1		1
470781008	2	1	1	2		1	1		2
470781025	3	1	2	1	2	2	1		2
470781042	3	2	2	1	2	1	1		1
470781136	3	2	2	1	2	1	1		1
470781138	3	1	4	1	2	2	3	3	5
470781243	3	3	3	1	2	1	3	4	3
470781474	3	1	4	1	2	1	1		1
470781475	3	1	3	1	1	1	2		1
470781667	3	2	2	1	1	1	1		1
470781687	3	2	3	1	2	2	3	1	2
470781805	3	3	1	1	2	1	2		2
470781842	3	2	1	1	1	1	1		1
470781915	3	2	1	1	1	1	1		2
470782194	3	2	2	1	2	1	1		2
470782342	3	1	1	1	2	1	2		1
470782403	3	2	1	1	1	1	1		1
470782475	3	2	2	1	2	2	4	3	4
470782516	3	2	2	1	2	2	5	5	5
470782924	3	2	1	1	2	1	1		1
470783010	3	2	1	1	1	1	2		1
470783255	2	2	4	1	2	2	3	2	3
470783327	3	2	1	1	1	1	1		1
470783641	3	2	2	1	2	1	1		1
470783710	3	2	3	1	2	2	2		2
470783725	3	1	3	1	2	1	1		1
470783739	2	3	4	2		1	3	2	3
470783766	3	2	3	1	2	1	2		1
470783874	3	1	1	1	2	1	2		1
470783944	2	3	3	2		2	1		1
470784013	3	1	1	1	2	1	1		2
470784122	3	1	3	1	2	2	3	3	3
470784691	3	1	4	2		2	1		3
470785129	2	1	2	1	2	1	2		3
470785135	2	1	1	1	2	1	3	4	2
470785247	3	2	3	1	2	1	2		2
470785288	2	2	1	1	1	1	2		3
470785339	3	2	1	1	1	1	1		2
470785372	3	2	2	1	1	1	1		1
470785387	3	2	3	1	2	1	1		1
470785436	2	2	2	1	2	2	5	2	5
470785550	3	2	4	1	1	1	1		2
470785598	3	2	3	1	2	1	1		1
470785617	3	2	1	1	2	1	1		2
470785648	3	2	1	1	1	1	1		1
470785667	3	2	1	1	2	1	1		1
470785876	2	2	4	1	2	2	3	3	3
470785977	2	1	2	2		1	3	2	3
470786176	3	2	2	1	2	1	1		1
470786213	3	1	3	1	2	1	3	3	3
470786234	3	2	1	1	1	1	1		1
470786388	3	2	2	1	2	2	1		2
470786457	3	2	1	2		1	2		2
470786862	3	2	2	2		1	3	2	2
470786988	3	2	2	1	2	1	2		2
470787261	3	2	2	1	2	1	1		2
470787376	3	1	3	1	2	1	1		1
470787722	3	2	2	1	2	1	5	4	5
470787769	3	2	1	1	2	1	1		3
470787870	3	2	2	1	2	1	1		1
470787898	3	2	1	1	1	1	1		2
470787947	2	1	2	2		2	1		1
470787980	3	2	2	1	2	1	2		2
470788096	3	2	2	1	2	2	4	3	5
470788105	3	2	2	1	2	2	3	2	5
470788291	3	2	1	1	1	1	1		1
470788350	2	3	4	2		2	1		1
470788383	3	2	1	1	2	1	1		1
470788885	2	1	4	2		1	4	4	4
470789011	3	2	2	1	1	1	1		1
470789288	3	2	2	2		2	2		2
470789935	3	2	1	1	1	1	1		1
470790472	3	2	2	1	2	2	5	1	5
470790647	3	2	3	1	2	1	1		1
470790747	3	2	1	1	1	1	1		2
470790947	2	3	4	2		1	4	4	4
470791135	3	2	1	1	1	1	1		1
470791145	3	3	2	1	2	2	2		2
470791218	3	2	1	1	2	1	1		1
470791223	3	2	2	1	2	1	1		1
470791271	3	2	2	1	2	1	1		2
470791341	3	2	2	2		1	3	1	4
470791376	3	2	1	1	1	1	1		2
470791411	2	2	4	2		1	3	2	3
470791807	3	2	1	1	1	1	1		2
470791934	3	2	2	1	2	1	1		1
470791964	3	3	1	1	1	1	1		1
470792010	3	1	1	2		1	1		1
470792268	3	2	1	1	1	1	1		1
470792297	2	2	3	1	2	2	5	3	5
470792730	3	1	2	1	1	1	1		1
470792733	2	3	2	1	2	2	3	2	2
470792995	3	1	2	2		2	1		1
470793178	2	2	4	2		2	2		2
470793198	3	1	2	1	2	2	3	3	5
470793442	3	1	2	1	2	2	4	5	4
470793546	3	2	2	1	2	1	1		1
470793675	3	2	2	1	2	1	2		1
470793689	2	3	2	2		2	2		2
470793770	3	2	3	1	2	1	1		1
470793772	3	2	1	1	1	1	1		2
470793842	3	2	2	1	2	1	1		1
470793966	3	2	3	1	2	1	1		1
470793971	3	2	3	1	2	1	1		1
470794299	3	2	2	1	1	1	1		2
470794352	3	2	1	1	2	1	2		1
470794779	3	2	1	1	2	1	1		1
470794784	3	1	3	2		1	1		1
470795021	2	2	3	1	1	1	2		2
470795047	3	2	3	1	2	1	1		2
470795393	3	2	2	1	2	1	1		1
470795405	3	2	3	1	2	1	1		1
470795544	3	2	1	1	1	1	1		1
470795570	3	2	2	1	2	1	1		1
470795676	2	2	4	1	2	2	1		2
470795677	3	1	1	1	2	1	1		1
470796100	3	2	1	1	1	1	1		2
470796181	3	2	2	1	2	1	1		1
470796304	3	2	2	1	1	1	1		1
470796333	2	2	3	2		2	1		1
470796773	3	2	1	1	2	2	1		2
470797115	3	3	2	1	1	1	1		1
470797235	3	1	2	1	2	1	1		1
470797690	2	1	3	2		2	5	3	5
470798552	3	2	1	1	1	1	1		2
470798798	3	1	2	1	2	2	4	2	1
470798890	2	1	2	1	2	1	5	2	5
470799329	3	2	2	1	2	1	2		2
470799439	3	2	2	1	2	1	1		1
470799664	3	2	2	1	2	1	1		1
470799703	2	3	4	2		2	4	3	4
470799707	3	2	1	1	2	1	1		1
470799798	3	2	1	1	1	1	1		2
470799824	3	2	2	1	2	1	1		1
470799990	3	2	4	1	2	2	1		1
470799999	3	2	3	1	2	1	1		1
470800017	3	2	4	2		1	2		1
470800109	2	3	2	2		2	2		2
470800238	2	2	4	1	1	2	1		1
470800316	2	2	3	2		2	2		2
470800470	3	2	1	2		1	1		2
470800581	2	1	3	2		1	2		2
470800629	2	1	3	2		2	3	4	3
470800693	3	2	1	1	2	1	1		1
470801043	3	2	3	1	2	1	1		1
470801488	3	2	3	1	2	1	1		1
470801572	2	1	2	1	2	1	3	3	3
470801669	3	2	2	1	2	1	4	3	5
470801786	3	2	1	1	2	2	1		1
470802086	3	1	1	1	2	2	1		3
470802087	3	2	1	1	1	1	2		2
470802166	3	2	3	1	2	1	1		1
470802278	3	2	2	1	2	1	1		1
470802316	2	2	2	2		1	4	4	3
470802741	3	3	1	1	1	1	1		1
470802799	2	2	4	2		2	3	3	4
470802802	2	2	2	1	2	2	2		3
470802868	3	1	2	1	2	2	3	4	3
470802874	3	2	2	1	2	1	2		1
470802933	3	2	2	2		1	2		2
470802975	3	2	3	1	2	1	1		1
470803002	3	2	2	1	2	1	1		1
470803887	2	2	4	2		1	1		1
470804084	3	2	1	1	1	1	1		1
470804122	3	2	4	1	1	1	1		1
470804160	3	3	1	1	1	1	1		1
470804342	2	1	2	1	2	2	2		3
470804424	2	1	2	2		2	2		3
470804451	3	2	3	1	1	1	1		2
470804654	3	1	1	1	1	1	1		1
470804867	3	3	3	1	1	1	1		1
470804933	3	2	2	1	2	1	1		2
470805120	3	2	1	1	1	1	2		2
470805185	3	2	2	2		2	1		1
470805258	3	2	1	1	1	1	1		1
470805288	3	3	3	2		2	1		1
470805294	3	2	3	1	2	1	1		1
470805345	3	2	2	1	2	1	1		1
470805788	2	1	4	2		1	1		1
470806044	3	2	1	1	2	1	1		1
470806089	3	2	1	1	2	1	1		2
470806160	3	1	2	1	2	2	5	2	5
470806304	3	2	1	1	1	1	1		1
470806332	3	1	1	1	2	1	2		1
470806524	3	2	4	1	2	1	1		2
470806560	2	1	1	2		2	5	2	5
470807097	3	2	2	1	2	1	1		1
470807417	3	2	3	1	2	1	1		1
470807749	3	2	2	2		2	1		1
470808179	2	1	4	2		1	3	2	3
470808970	3	2	3	1	2	1	1		1
470809013	3	2	1	1	1	1	1		1
470809375	3	1	2	1	2	1	2		1
470809425	2	3	4	1	2	1	3	2	3
470810223	3	2	3	2		2	1		1
470810388	3	2	2	1	2	2	1		1
470810426	3	1	2	1	2	2	5	4	5
470810428	3	1	2	1	2	2	5	1	5
470810623	3	2	1	1	1	1	1		1
470810674	3	2	1	2		1	1		1
470810899	3	3	2	1	2	2	1		1
470810923	3	2	4	1	1	1	1		1
470810925	3	2	1	1	1	1	1		1
470810936	3	1	4	1	2	1	1		1
470810939	3	2	1	1	1	1	1		1
470811103	3	2	1	1	2	1	1		1
470811194	3	1	3	1	2	1	1		1
470811402	3	2	3	1	1	1	1		1
470811432	2	2	2	2		1	2		2
470811437	3	2	3	1	2	1	1		1
470811526	3	2	3	1	2	1	1		1
470811710	3	2	4	1	2	1	1		1
470811739	3	1	1	1	2	2	1		1
470811852	3	2	2	1	2	1	2		2
470811856	3	2	2	1	2	1	1		1
470811961	3	1	4	1	2	2	1		2
470812027	3	2	1	2		1	1		1
470812283	3	2	3	1	2	1	1		1
470812501	3	1	4	1	2	2	4	3	1
470812844	3	1	3	2		2	2		2
470812875	3	1	2	1	2	2	4	3	4
470812877	3	2	1	1	1	1	1		1
470812978	3	1	2	1	2	2	3	4	3
470813045	3	2	1	1	1	1	1		2
470813243	3	2	2	1	2	1	2		2
470813449	2	1	4	2		1	3	4	3
470813506	3	2	2	1	2	2	1		1
470813542	3	3	1	1	2	2	1		1
470813926	3	2	1	1	2	1	2		2
470814584	3	2	3	1	2	1	1		1
470814599	3	2	4	2		2	3	2	4
470814637	3	2	1	2		1	1		1
470814694	3	2	2	1	1	1	1		1
470814805	3	2	2	1	2	1	2		2
470814845	3	2	1	1	1	1	1		1
470814918	3	2	2	1	2	1	2		2
470815369	3	2	2	1	1	1	1		1
470815393	3	2	2	1	1	1	1		1
470815454	3	3	1	1	2	1	1		2
470815587	3	2	2	1	1	1	2		1
470816050	3	2	4	2		2	1		1
470816086	3	2	3	1	2	1	1		1
470816152	3	1	1	1	2	2	2		1
470816305	3	1	4	1	2	2	2		2
470816391	3	3	4	1	1	1	3	2	3
470816417	3	2	3	1	2	2	1		2
470816495	3	2	1	1	1	1	1		1
470816518	3	2	4	1	2	2	1		1
470816534	3	2	2	1	1	1	1		2
470816672	2	1	4	2		2	3	1	3
470816695	3	2	1	1	2	1	1		1
470816771	3	2	1	2		1	1		1
470816788	3	3	4	2		1	4	2	1
470816946	3	2	2	2		2	3	2	1
470817011	3	2	1	1	1	1	1		1
470817049	3	1	2	1	1	1	1		1
470817156	3	2	3	1	2	1	2		1
470817190	3	2	3	1	2	1	2		2
470817318	3	1	3	1	2	2	2		2
470817448	3	2	3	1	1	1	1		2
470818331	3	2	2	1	1	1	1		1
470818392	3	3	4	1	1	1	2		1
470818636	3	3	2	1	2	2	1		1
470818855	3	2	1	1	1	1	1		1
470818929	3	2	3	2		2	1		1
470819077	3	2	1	1	1	1	1		1
470819169	2	1	2	1	1	1	2		2
470821451	2	1	4	1	2	1	3	2	1
470825706	2	1	2	1	2	1	2		1
470827174	2	3	4	2		1	2		2
470830035	2	1	1	2		1	3	3	2
470836452	2	3	4	2		2	2		2
470841198	2	2	4	2		2	2		2
470843759	2	1	4	2		2	4	2	3
470844500	2	2	4	2		2	5	2	5
470844970	2	2	2	1	1	1	2		1
470855705	2	2	2	2		1	3	2	2
470858269	2	1	4	2		1	1		1
470861811	2	2	4	1	2	1	1		2
470863683	2	1	4	1	2	2	3	4	3
470865747	2	2	4	1	2	2	3	2	3
470871421	2	2	4	2		1	5	2	4
470871617	2	2	2	1	2	1	3	3	3
470871847	2	2	4	2		1	1		1
470872033	2	1	4	1	2	1	1		2
470875635	2	2	4	1	2	2	3	2	2
470875800	2	2	4	2		1	3	2	1
470877189	2	2	4	1	2	2	3	2	3
470877783	2	3	1	1	2	2	1		2
470878173	2	2	4	2		2	2		2
470879710	2	1	2	1	1	1	2		2
470880356	2	4	1	2		1	5	5	3
470881037	2	1	4	1	1	1	1		1
470881315	2	2	4	2		2	2		2
470881601	2	1	2	1	2	2	3	1	3
470881864	2	2	3	2		2	2		2
470882914	2	2	4	1	2	1	1		1
470883678	2	2	2	2		1	1		1
470884999	2	2	3	2		1	2		2
470885167	2	2	4	1	2	2	1		1
470885241	2	1	2	1	2	1	2		3
470885676	2	3	1	2		2	5	2	5
470887286	2	1	4	1	2	1	1		1
470887321	2	2	4	2		2	1		2
470888105	2	2	3	2		2	1		1
470888362	2	1	4	1	2	2	2		2
470889016	2	2	2	1	2	1	2		2
470889912	2	1	4	2		2	5	2	5
470890089	2	2	4	2		2	3	2	3
470891088	2	1	3	1	2	2	5	3	5
470891150	2	1	3	1	1	1	2		1
470892461	2	2	3	2		2	5	2	5
470892632	2	2	4	2		2	2		2
470892678	2	2	2	2		2	2		4
470892991	2	2	4	2		2	1		1
470893680	2	2	4	2		2	3	2	3
470893846	2	2	4	2		2	3	2	3
470893908	2	2	4	2		2	1		1
470894995	2	2	4	2		1	4	2	4
470895005	2	2	1	2		1	3	1	3
470895107	2	2	4	2		2	3	2	3
470895255	2	3	3	1	2	2	1		1
470895618	2	2	4	1	2	2	1		1
470895973	2	2	4	2		2	1		1
470895989	2	3	4	1	2	1	3	2	3
470896001	2	2	4	2		1	3	1	3
470897920	2	2	2	1	2	2	5	3	5
470898035	2	2	4	1	2	2	2		1
470898069	2	2	4	2		2	3	2	3
470898921	2	2	4	1	2	2	1		1
470899327	2	1	2	1	2	2	1		2
470899351	2	2	4	2		2	2		2
470899633	2	2	4	2		2	3	2	3
470901850	2	1	4	2		2	1		1
470902342	2	1	1	1	2	1	2		2
470902523	2	2	2	1	2	2	5	5	3
470902981	2	1	2	2		2	1		1
470903410	2	2	2	1	2	2	2		1
470904440	2	2	4	1	2	2	3	2	3
470904857	2	2	4	1	2	1	3	2	4
470905173	2	1	1	1	2	1	4	4	4
470905220	2	2	2	1	1	1	2		2
470905451	2	2	4	1	2	2	2		2
470905943	2	2	4	2		2	3	2	3
470906251	2	2	2	1	2	1	2		3
470906596	2	3	3	1	2	2	2		2
470906636	2	2	3	2		2	3	3	2
470908553	2	1	1	1	2	2	2		1
470909175	2	2	4	1	1	2	1		1
470909185	2	2	4	1	2	2	5	2	5
470911060	2	1	3	2		2	3	5	5
470911361	2	2	4	1	2	2	2		2
470911468	2	2	4	2		1	5	5	5
470911868	2	1	4	2		1	5	2	5
470911970	2	1	1	1	1	1	1		2
470912758	2	3	4	2		2	5	1	4
470914392	2	1	4	2		2	3	2	3
470914767	2	3	4	2		2	1		1
470916976	2	1	3	2		2	2		1
470917309	2	1	4	1	2	2	1		1
470920407	2	1	4	1	2	2	2		2
470921372	2	1	4	2		1	4	2	4
470922752	2	2	4	1	2	2	1		1
470923252	2	3	4	2		2	1		1
470924072	2	2	4	1	2	2	5	2	5
470925099	2	1	3	2		2	3	2	2
470925564	2	2	2	1	2	1	4	3	3
470926418	2	3	4	1	2	2	3	2	3
470927178	2	2	4	2		2	2		2
470927736	2	2	3	2		1	2		2
470927737	2	3	2	1	2	2	4	4	5
470928132	2	2	4	1	2	2	1		1
470928358	2	1	4	2		2	3	2	2
470929095	2	2	4	2		2	3	2	3
470929253	2	3	4	2		1	1		1
470929308	2	2	2	1	1	1	2		2
470929770	2	2	2	1	1	1	2		3
470931855	2	2	2	1	1	1	3	3	2
470934645	2	2	2	2		1	2		3
470935858	2	2	4	1	2	2	1		1
470941065	2	1	4	1	2	1	3	2	4
470941173	2	1	2	1	2	1	2		3
470942321	2	1	2	1	1	1	2		3
470942392	2	2	3	2		2	3	3	3
470946390	2	2	2	2		2	2		2
470947596	2	2	2	2		1	1		1
470952429	2	1	2	1	2	1	1		1
470952834	2	1	4	1	2	2	2		2
470953663	2	2	4	2		2	4	1	4
470958660	2	2	4	1	2	2	5	2	5
470962231	2	2	2	1	2	2	1		1
470968802	2	1	2	1	1	1	2		2
470968820	2	2	1	2		2	3	2	3
470969699	2	2	3	2		2	4	2	4
470971934	2	2	2	1	2	1	2		2
470972223	2	1	4	1	2	1	3	3	5
470975555	2	2	4	1	2	2	3	1	3
470978746	2	2	4	2		2	4	2	4
470978945	2	1	4	2		2	1		1
470981112	2	1	4	2		2	5	2	5
470982324	2	2	4	1	2	2	4	3	4
470982718	2	4	3	1	1	1	2		2
470983377	2	1	1	1	2	1	4	4	3
470983589	2	3	3	1	1	1	3	3	1
470985232	2	2	4	2		2	1		1
470985740	2	3	2	1	2	2	2		1
470987866	2	1	3	1	2	1	2		2
470989361	2	1	4	1	2	2	1		1
470989855	2	3	3	2		2	3	4	3
470989885	2	1	1	1	2	1	2		2
470990752	2	2	4	1	2	2	2		2
470991717	2	2	3	1	2	2	2		3
470992389	2	2	1	1	2	2	2		2
470992501	2	1	4	1	2	2	1		3
470992800	2	1	2	1	1	1	3	4	2
470992845	2	2	2	1	1	1	2		2
470995275	2	3	1	1	1	1	2		2
470995531	2	1	4	1	2	2	2		2
470995857	2	1	3	2		2	1		1
470996467	2	2	3	2		2	3	5	3
470996611	2	2	4	1	2	1	2		2
471001127	2	1	1	2		2	2		2
471001236	2	2	1	1	1	1	2		1
471002338	2	1	3	1	2	2	5	5	5
471005478	2	1	2	1	2	1	1		1
471005807	2	3	1	2		1	5	3	5
471006601	2	1	3	1	2	1	2		3
471007750	2	2	1	1	1	1	1		1
471009076	2	2	4	1	2	2	1		1
471009793	2	2	3	1	2	2	2		2
471009856	2	1	4	1	2	2	3	2	3
471009959	2	1	2	2		2	3	3	4
471010987	2	2	4	1	2	1	1		1
471011068	2	2	4	2		2	1		1
471012729	2	1	3	1	1	1	2		2
471014138	2	2	3	2		1	5	2	4
471017309	2	1	1	1	1	1	1		1
471018249	2	2	3	1	1	2	2		2
471018639	2	2	3	2		2	3	2	3
471020717	2	2	2	1	2	2	2		2
471021363	2	2	2	2		2	2		2
471021506	2	2	4	1	2	2	2		2
471021900	2	3	3	2		2	1		1
471023863	2	2	3	2		2	3	2	1
471026338	2	2	3	2		2	3	3	3
471026938	2	2	3	1	2	1	1		1
471027191	2	2	4	2		2	1		2
471027812	2	3	2	2		2	3	3	3
471028064	2	2	4	1	2	2	1		1
471028713	2	2	2	1	2	2	1		2
471030534	2	2	3	2		2	3	2	3
471030581	2	2	1	2		2	3	2	2
471031004	2	2	4	2		2	5	2	3
471031818	2	2	4	2		1	1		1
471031972	2	2	4	1	2	2	1		1
471032606	2	1	4	1	1	2	2		1
471032924	2	2	2	2		2	3	2	2
471032969	2	3	2	2		1	1		2
471033434	2	2	4	2		2	2		2
471034534	2	1	2	1	1	1	2		2
471034973	2	1	4	1	1	1	1		1
471035241	2	1	3	1	1	1	1		1
471035541	2	2	2	1	2	1	2		2
471037812	2	2	4	2		2	4	2	4
471040122	2	1	1	1	2	1	2		3
471040366	2	2	2	1	1	1	3	3	3
471040577	2	1	3	1	1	1	2		2
471040805	2	2	4	2		2	3	2	3
471040862	2	1	4	2		2	5	2	5
471041114	2	1	4	2		2	2		2
471041146	2	1	3	1	1	1	3	3	1
471041473	2	2	4	2		2	5	3	5
471041686	2	3	4	2		2	2		2
471042532	2	1	4	2		2	4	2	4
471043117	2	1	3	1	2	1	4	2	5
471043855	2	2	4	2		2	4	2	4
471044448	2	2	4	2		1	1		1
471044943	2	1	4	2		2	2		2
471046356	2	1	1	1	2	1	1		2
471047094	2	4	2	2		2	3	2	3
471048975	2	1	3	1	2	1	2		2
471049931	2	2	4	2		1	3	2	2
471050029	2	1	1	1	2	1	1		2
471051376	2	1	3	2		2	2		2
471051572	2	4	1	1	2	1	2		3
471051731	2	2	2	1	1	1	2		2
471052163	2	2	2	1	2	1	2		2
471052251	2	2	2	1	2	2	3	2	3
471052495	2	1	4	1	2	2	1		1
471055378	2	1	2	1	2	1	3	3	2
471056728	2	2	2	1	1	1	1		2
471057056	2	2	3	1	2	1	1		1
471058523	2	1	2	1	1	1	2		2
471058780	2	2	2	1	2	2	2		1
471058984	2	2	2	1	2	2	2		2
471059221	2	2	3	1	1	1	2		2
471059338	2	1	4	1	2	1	3	2	3
471059527	2	1	4	2		2	2		2
471060516	2	2	4	1	1	1	2		2
471061403	2	3	2	2		2	3	2	3
471061540	2	2	1	1	2	1	3	2	3
471062056	2	1	4	1	2	1	1		1
471062831	2	1	2	1	2	2	1		1
471063991	2	1	1	2		2	1		1
471063998	2	3	2	1	2	1	3	4	3
471064429	2	2	3	1	2	1	3	2	2
471064586	2	2	1	1	2	2	1		1
471065117	2	1	3	1	1	1	3	2	1
471066385	2	1	3	2		1	3	1	4
471066653	2	1	4	1	1	1	3	3	2
471067427	2	2	2	2		1	1		1
471068530	2	2	4	2		2	1		1
471070241	2	1	2	1	2	1	3	2	2
471070708	2	1	3	2		2	4	2	5
471072280	2	2	4	2		2	3	2	3
471072805	2	1	4	1	2	2	3	2	4
471073212	2	2	4	2		2	2		2
471073225	2	1	2	2		2	2		2
471074264	2	3	3	1	2	1	1		3
471075382	2	2	2	2		1	2		1
471077987	2	2	3	2		2	5	2	5
471078037	2	1	1	1	2	2	1		1
471079478	2	2	3	1	2	1	1		2
471085113	2	1	1	1	1	1	1		2
471085645	2	2	4	2		2	4	4	4
471086701	2	3	1	1	2	1	3	2	3
471087729	2	1	1	1	1	1	1		1
471087752	2	2	3	2		2	3	3	2
471088427	2	2	1	2		1	4	5	4
471089635	2	1	4	1	2	2	1		2
471092801	2	1	1	2		1	2		2
471094415	2	1	2	2		1	4	2	3
471095517	2	2	2	2		2	2		2
471097776	2	1	2	1	2	2	1		1
471097855	2	2	1	2		2	5	5	5
471098149	2	2	4	2		1	5	2	5
471099859	2	1	2	1	2	1	5	3	2
471100041	2	2	2	1	1	1	1		1
471101686	2	1	2	1	2	2	4	2	4
471101932	2	1	3	1	1	1	3	4	3
471102586	2	1	3	2		2	5	2	5
471102673	2	2	3	1	1	1	1		1
471103604	2	2	2	1	1	1	1		1
471103673	2	2	2	1	1	1	1		1
471104706	2	2	2	1	1	1	1		1
471104779	2	2	2	1	1	1	1		1
471104822	2	2	2	1	1	1	1		1
471104851	2	2	2	1	1	1	1		2
471105292	2	2	2	1	1	1	1		1
471105833	2	2	2	1	1	1	1		1
471106414	2	2	2	1	1	1	2		1
471106784	2	2	2	1	1	1	1		1
471106819	2	2	2	1	1	1	1		1
471107186	2	2	2	1	1	1	2		2
471107249	2	2	2	1	1	1	1		1
471107308	2	2	2	1	1	1	1		2
471107854	2	2	2	1	1	1	2		1
471108620	2	2	2	1	1	1	1		1
471108827	2	2	2	1	1	1	1		1
[truncated: 11 more rows]

## Sheet: Questions
Q1	Which category includes your age?
Q2	Please indicate which stage of pregnancy or postpartum you are currently in.
Q19	Have you received a COVID-19 viral test (test that identifies current infection)?
Q20	What was the outcome of this test?
Q30	Are you managing any health issues (not related to your pregnancy or recent birth)?
Q76	Once a COVID-19 vaccine is available, how open would you be to take a vaccine to prevent COVID-19 during pregnancy or postpartum?
Q77	Why are you unsure or not open to taking a COVID-19 vaccine once it is available?
Q78	Once a COVID-19 vaccine is available, how likely are you to allow your child/children or other family member(s) to take a vaccine to prevent COVID-19?

## Sheet: Variable Values
Question	Value	Variable
QCOUNTRY	1	United States
	2	United Kingdom
	3	India
	4	Brazil
Q1	1	18-29
	2	30-39
	3	40-49
	4	50-59
	5	60+
Q2	1	First trimester (0 weeks – 12 weeks)
	2	Second trimester (13 – 27 weeks)
	3	Third trimester (27 – 40 weeks)
	4	Postpartum (up to one year following childbirth)
	5	I am not currently pregnant
Q19	1	Yes
	2	No
Q20	1	Positive
	2	Negative
Q30	1	Yes
	2	No
Q76	1	Very open
	2	Open
	3	Neutral/unsure
	4	Not very open
	5	Not open at all
Q77	1	Lack of compelling information on benefits
	2	Safety and side effect(s) concerns
	3	Mistrust of health and/or political authorities
	4	Conspiracy theories worry me
	5	I do not believe vaccinations (general) provide any benefit
Q78	1	Very open
	2	Open
	3	Neutral/unsure
	4	Not very open
	5	Not open at all
